# Supplementary material for: Sexual violence and neonatal outcomes: a Norwegian population-based cohort study
Source: PubMed Central journal article supplement — BMJ Open. 2014 Oct 14;4(10):e005935. doi: 10.1136/bmjopen-2014-005935 (PMC4201994; doi:10.1136/bmjopen-2014-005935), 2014-10-14
Supplement: bmjopen-2014-005935.draft_revisions.pdf [file bmjopen-2014-005935.draft_revisions.pdf]

# BMJ Open

## Sexual violence and neonatal outcomes: a population-based cohort study

|                                 |                                                                                                                                                                                                                                                                                                                                                                                                                                                                                             |
|---------------------------------|---------------------------------------------------------------------------------------------------------------------------------------------------------------------------------------------------------------------------------------------------------------------------------------------------------------------------------------------------------------------------------------------------------------------------------------------------------------------------------------------|
| Journal:                        | <i>BMJ Open</i>                                                                                                                                                                                                                                                                                                                                                                                                                                                                             |
| Manuscript ID:                  | bmjopen-2014-005935                                                                                                                                                                                                                                                                                                                                                                                                                                                                         |
| Article Type:                   | Research                                                                                                                                                                                                                                                                                                                                                                                                                                                                                    |
| Date Submitted by the Author:   | 19-Jun-2014                                                                                                                                                                                                                                                                                                                                                                                                                                                                                 |
| Complete List of Authors:       | Henriksen, Lena; Oslo University Hospital, Department for Women's and Children's Health<br>Schei, Berit; Norwegian University of Science and Technology, Department of Public Health and General Practice, Faculty of Medicine; St Olavs University Hospital, Department of Obstetrics and Gynaecology<br>Vangen, Siri; Oslo University Hospital, Department for Women's and Children's Health<br>Lukasse, Mirjam; Oslo and Akershus University College, Norway, Faculty of Health Sciences |
| <b>Primary Subject Heading</b>: | Obstetrics and gynaecology                                                                                                                                                                                                                                                                                                                                                                                                                                                                  |
| Secondary Subject Heading:      | Obstetrics and gynaecology, Epidemiology                                                                                                                                                                                                                                                                                                                                                                                                                                                    |
| Keywords:                       | Fetal medicine < OBSTETRICS, Maternal medicine < OBSTETRICS, EPIDEMIOLOGY                                                                                                                                                                                                                                                                                                                                                                                                                   |
|                                 |                                                                                                                                                                                                                                                                                                                                                                                                                                                                                             |

SCHOLARONE™  
Manuscripts

only

**TITLE PAGE**

Title: Sexual violence and neonatal outcomes: a population-based cohort study

Lena Henriksen<sup>1</sup>, Berit Schei<sup>2,3</sup>, Siri Vangen<sup>4</sup>, Mirjam Lukasse<sup>5</sup>

Corresponding author: Lena Henriksen<sup>1</sup>, Section of Obstetrics, Department for Women's and Children's Health, Oslo University Hospital, Postboks 4950 Nydalen, N-0424 Oslo, Norway.

E-mail: uxhelz@ous-hf.no Phone: +47 90068485.

Co-authors: Berit Schei<sup>2</sup>, Department of Public Health and General Practice, Faculty of Medicine, The Norwegian University of Science and Technology (NTNU), Håkon Jarls gate 11, N-7489 Trondheim, Norway. <sup>3</sup>Department of Obstetrics and Gynecology, St.Olavs Hospital, Trondheim University Hospital, Postbox 3250 Sluppen, N-7006 Trondheim, Norway.

Siri Vangen<sup>4</sup>, National Resource Centre for Women's Health, Department for Women's and Children's Health, Oslo University Hospital, Postboks 4950 Nydalen, N-0424 Oslo, Norway.

Mirjam Lukasse<sup>5</sup>, Department of Health, Nutrition and Management, Faculty of Health Sciences, Oslo and Akershus University College of Applied Sciences, Postboks 4 St. Olavs plass, N-0130 Oslo, Norway.

Keywords: Sexual violence, rape, premature birth, low birth weight, small for gestational age, MoBa.

Word count: 3644

## ABSTRACT

**Objective:** The objective of this study was to explore the association between sexual violence and neonatal outcomes.

**Design:** National cohort study.

**Setting:** Women were recruited to the Norwegian Mother and Child Cohort Study (MoBa) when attending routine ultrasound examinations from 1999-2008.

**Population:** A total of 76 870 pregnant women.

**Methods:** Sexual violence and maternal characteristics were self-reported in postal questionnaires during pregnancy. Neonatal outcomes were retrieved from the Medical Birth Registry of Norway (MBRN). Risk estimations were performed with linear and logistic regression analysis.

**Outcome Measures:** Gestational age at birth, birth weight, preterm birth (PTB), low birth weight (LBW) and small for gestational age (SGA).

**Results:** Of 76 870 women, 18.4% reported a history of sexual violence. A total of 4.7% had a premature birth, 2.7% had children with a birth weight <2500 g and 8.1% children were small for gestational age. Women reporting both moderate and severe sexual violence (rape) had a significantly reduced gestational length (2 days) when the birth was provider-initiated in an analysis adjusted for age, parity, education, smoking, BMI and mental distress. Those exposed to severe sexual violence had a significantly reduced gestational length of 0.51 days with a spontaneous start of birth. Crude estimates showed that severe sexual violence was associated with PTB, LBW and SGA. When controlling for the above-mentioned socio-demographic and behavioural factors, the association was no longer significant.

**Conclusions:** Sexual violence was not associated with adverse neonatal outcomes. Moderate and severe violence had a small but significant effect on gestational age; however, the clinical influence of this finding is most likely limited. Women exposed to sexual violence in this study reported more of the socio-demographic and behavioural factors associated with PTB, LBW and SGA compared with non-abused women.

## STRENGTHS AND LIMITATIONS OF THIS STUDY

- This study was based on information from a large population-based study described as sufficient for large-scale epidemiologic studies.
- All outcomes were collected prospectively from a quality-assessed birth register.
- The setting, with small social and health inequalities, was suitable to isolate the effect of sexual violence on adverse neonatal outcomes.
- A non-validated instrument for measuring of the exposure variable was a limitation to this study.

## INTRODUCTION

Preterm birth is a common and costly health problem.[1, 2] Approximately one in ten babies are born preterm worldwide, and prematurity is considered to be the leading cause of death for newborns.[2] Low birth weight (LBW) can be a consequence of preterm birth (PTB) or intra uterine growth restriction, the latter leading to the birth of small for gestational age (SGA) infants.[3] Research has identified some biological risk factors for PTB and LBW: ethnicity, multiple pregnancies, a previous preterm birth and uterine or placental abnormalities.[1, 3] Studies also emphasise behavioural and social factors as important but less understood factors for both PTB and LBW.[1] These factors can be maternal age, socio-economic status, maternal weight, substance abuse, stress, depression and violence.[1, 2, 4]

Violence against women is a significant public health problem, and a recent report from the World Health Organization (WHO) state that 35% of women worldwide have experienced either physical and/or sexual intimate partner violence or non-partner sexual violence.[5] A pregnancy does not protect women from violence, and the prevalence of physical or sexual violence during pregnancy ranges from 3.4-11% in high-income countries.[6] It is recognised that violence has an adverse impact on women's physical, sexual, reproductive, and mental health.[5, 7] A connection between PTB or LBW and violence against women has been reported, but the association is both supported and contradicted.[5, 8-20] Studies have primarily addressed physical abuse during pregnancy and PTB or LBW [8, 10, 11, 16-19, 21] or child sexual abuse and PTB/LBW.[9, 12] Results from a new meta-analysis published in the recent WHO report [5] have demonstrated an association between intimate partner violence, including both physical and sexual abuse, and PTB with an adjusted odds ratio (AOR) of 1.41 (95% CI 1.21-1.62) and AOR of 1.16 (95% CI: 1.02-1.29) with LBW.[5]

1  
2  
3 However, studies on sexual violence and neonatal outcomes are limited, and few population-  
4 based studies with large sample sizes that enable controlling for confounding variables have  
5 been conducted [5, 11] Thus, there is a need to study the potential effect of lifetime sexual  
6 violence on outcomes for newborns using a large cohort. The Norwegian Mother and Child  
7 Cohort Study (MoBa) is a population-based prospective cohort study of pregnant women that  
8 includes measurements of lifetime sexual violence and other relevant covariates. In this study,  
9 we assessed the relationship between sexual violence and gestational age at birth and birth  
10 weight. Additionally, we explored the associations between sexual violence and PTB, LBW  
11 and SGA.  
12  
13  
14  
15  
16  
17  
18  
19  
20  
21  
22  
23  
24

## 25 **METHODS**

26  
27 This study was a sub-project in the MoBa study that was conducted by the Norwegian  
28 Institute of Public health from 1999-2008.[22] All pregnant women in Norway were eligible  
29 to participate in MoBa, and they were recruited during their routine foetal ultrasound  
30 examination. Of the invited women, 40.6% consented to participate. Data were obtained  
31 through extensive self-administered questionnaires that contained demographic factors,  
32 general health, reproductive history and questions about maternal health status during  
33 pregnancy. Our analyses were based on questionnaire 1 (Q1), which was completed during  
34 (approximately) gestational week 17, and questionnaire 3 (Q3), which was completed during  
35 (approximately) gestational week 30. Data from MoBa were linked with data from the  
36 Medical Birth Registry of Norway (MBRN), which provided information on pregnancy and  
37 birth outcome. The current study is based on version VI of the quality-assured data files  
38 released for research in 2011. The MoBa study is described in detail elsewhere.[22]  
39  
40  
41  
42  
43  
44  
45  
46  
47  
48  
49  
50  
51  
52  
53  
54  
55  
56  
57  
58  
59  
60

### Study population

This study included women who had a singleton birth between 22 and 44 weeks of gestation, who completed both Q1 and Q3, had MBRN data available and participated for the first time (79 363 women). While a pregnancy is the observation unit in the MoBa study, women are the observation unit in our study; hence, the exclusion of 13 475 pregnancies of women who participated more than once. We excluded 703 women who did not answer the questions on sexual violence. Further, we excluded records with missing data on gestational length (n= 297) and birth weight (n=41). We also excluded 6 children with birth weight <500 g and 4 children with birth weight >6000 g, leaving a study sample of 76 870 women (Figure 1).

### Ethical statement

Informed consent was obtained from each women participating in the study. The Regional Committee for Medical Research Ethics (Ref.SAFH 95/313 RTL) and the Norwegian Data Inspectorate approved the study.

### Variables

#### Exposure variable

The exposure variable was collected from Q1; here, the women were asked if they had been 1) pressured to perform sexual acts, 2) forced with violence or 3) raped. A positive answer was defined as having experienced sexual violence. Women with more than one positive answer were classified according to the most severe level reported. The answers were coded into three levels of severity for the sexual violence: 1) mild, 2) moderate and 3) severe, and by the timing of the abuse (previously or recent). Recent meant exposed to sexual violence in the current pregnancy or the last 6 or 12 months before pregnancy. More details about the exposure variable can be found in our previous studies.[23;24]

### Outcome variables

All outcome variables were obtained from the MBRN. Gestational age at birth in days was based on ultrasound at (approximately) gestational week 18. For women with no ultrasound, the gestational age was based on the last menstrual period (1.7%). PTB was defined as a gestational age <37, LBW as a birth weight <2500 grams, and SGA was defined as birth weight below the 10th percentile for the gestational age at birth. SGA was calculated using Norwegian specific foetal growth tables by Skjerven et al.[25]

### Adjusting variables

Maternal age, parity, socio-economical status, smoking and body mass index (BMI) were considered as possible confounding factors and were adjusted for. All adjusting variables were taken from the MoBa. In Q1, age was categorised into 5 groups: younger than 20 years, 20–24 years, 25–29 years, 30–34 years or 35 years and older. As a proxy for socio-economic status, we used the woman's education in years (categorised into 4 groups): primary (<12 years), secondary (12 years), higher  $\leq 4$  years (13–16 years) and higher >4 years ( $\geq 17$  years). Parity was dichotomised into nulli- and multiparous women. Smoking was categorised as no smoking or smoking, which included both daily and occasional smoking. BMI was grouped into 4 categories: <20, 20-24.9, 25.0-29.9 or  $\geq 30.0$  kg/m<sup>2</sup>. We also adjusted for mental distress because it is considered to be associated with both the exposure and the outcome.[4,5] Mental distress was measured using 5 items from The Hopkins symptoms checklist (SCL-5) with a cut-off at  $\geq 2.0$  points, as suggested by Strand [26] and obtained from Q3.

Because of the co-occurrence of different violence types,[7] we examined the effect of physical and emotional abuse as a child or as an adult in the multivariable statistical models.

1  
2  
3 Information on adult physical violence was taken from Q1 and consisted of a positive answer  
4 to whether women as an adult had experienced being slapped, hit, kicked or otherwise  
5 bothered in a physical manner. Child physical violence was taken from Q3 and consisted of a  
6 positive answer to the question “Have you experienced physical violence before the age of  
7 18?” Emotional abuse as a child (<18) or as an adult ( $\geq 18$ ) consisted of a positive answer to  
8 either, “Someone has over a long period of time systematically tried to subdue, degrade or  
9 humiliate you” or “Someone has threatened to hurt you or someone close to you” or both.  
10  
11  
12  
13  
14  
15  
16  
17  
18  
19

20  
21 Previous preterm birth and inadequate antenatal care are considered to be associated with the  
22 exposure and the outcomes.[2, 3, 5] Because a previous preterm birth may be a result of  
23 sexual violence prior to the related pregnancy, we did not control for a previous preterm birth.  
24 In Norway, the majority of women attend antenatal care, a free and a well-integrated part of  
25 the public health system; therefore, we did not control for antenatal care. Ethnicity was not  
26 considered a relevant confounding factor in our study because the majority of the MoBa  
27 participants are ethnic Norwegian.  
28  
29  
30  
31  
32  
33  
34  
35  
36  
37

### 38 **Statistical Analysis**

39  
40 Characteristics were presented as percentages within the entire sample and the different  
41 outcomes. Linear regression was performed to assess differences in birth weight and  
42 gestational age for children born to women with and without a history of mild, moderate and  
43 severe sexual violence. The association between sexual violence and PTB, LBW and SGA  
44 was estimated with crude and adjusted odds ratios using logistic regression analysis. All  
45 analyses were adjusted for maternal age, parity, education, smoking, BMI and mental distress  
46 in the first step. Birth weight was additionally adjusted for gestational age. We further  
47 adjusted for other types of violence in the second step. We initially tested the correlation  
48  
49  
50  
51  
52  
53  
54  
55  
56  
57  
58  
59  
60



1  
2  
3 between other types of violence and sexual violence because of co-occurrence, and all  
4  
5 Pearson's correlation coefficients were below the generally accepted cut-off of  $<0.4$  for use as  
6  
7 a covariate in the regression analyses.[27] Post protocol, we stratified the sample into  
8  
9 spontaneous start of birth and provider-initiated start of birth (induced start of birth or elective  
10  
11 caesarean section) for gestational age because a provider-initiated start could influence the  
12  
13 time point of birth. Information on how the birth started was taken from MBRN. We  
14  
15 additionally performed a sensitivity analysis in which we examined the association between  
16  
17 sexual violence and SGA and LBW among women who had a spontaneous birth at term ( $\geq 37$   
18  
19 weeks) because we wanted to examine the effect of violence in a group of women who were  
20  
21 considered to be low risk according to gestational age and start of birth. When we examined  
22  
23 the timing of the sexual violence, we compared women who were exposed to recent (sexual  
24  
25 violence during pregnancy or the last 6 or 12 months) and those exposed to previous sexual  
26  
27 violence during pregnancy or the last 6 or 12 months) and those exposed to previous sexual  
28  
29 violence to non-abused women. We also examined the timing among women reporting recent  
30  
31 and previous severe sexual violence (rape) for all outcomes. The prevalence of missing data  
32  
33 was generally low with 2.5% for BMI, 3.7% for education, and 0.7% for smoking during  
34  
35 pregnancy. Because of this, no imputing methods for missing data were used,[28] except for  
36  
37 the missing data for the SCL-5 (3.2%), which were replaced by the series mean. The results of  
38  
39 the logistic regression analyses remained approximately the same when performed with the  
40  
41 complete exclusion of missing data compared with using the imputed missing data for SCL-5.  
42  
43  
44  
45  
46  
47 The comparison group for all analyses was women not reporting any sexual violence. All  
48  
49 analyses were performed with the statistical package SPSS for WINDOWS (SPSS Inc.,  
50  
51 Chicago, IL, USA) version 18. P-values  $<0.05$  were considered statistically significant.  
52  
53  
54  
55  
56  
57  
58  
59  
60

## RESULTS

The mean gestational age at birth in the total sample was 279.6 days (standard deviation 11.9 days), and the mean birth weight was 3592.7 grams (standard deviation 547.1 g). Table 1 displays the characteristics in the total sample and by the different outcomes.

Table 1. Background characteristics in the total sample and by preterm birth (PTB): gestational age <week 37, low birth weight (LBW): weight <2500 g and small for gestational age (SGA) weight below the 10<sup>th</sup> percentile by gestational age at birth in the Mother and Child Cohort

|                               | Total | PTB    | LBW    | SGA    |
|-------------------------------|-------|--------|--------|--------|
|                               | N=76  | N=3620 | N=2107 | N=6257 |
|                               | 870   | %      | %      | %      |
|                               | %     |        |        |        |
| <hr/>                         |       |        |        |        |
| Age                           |       |        |        |        |
| <20                           | 1.5   | 2.2    | 2.6    | 1.9    |
| 20–24                         | 12.2  | 12.7   | 13.8   | 13.2   |
| 25–29                         | 36.2  | 34.6   | 34.8   | 36.4   |
| 30–34                         | 35.7  | 33.7   | 33.2   | 34.2   |
| ≥35                           | 14.4  | 16.7   | 15.6   | 14.3   |
| Education                     |       |        |        |        |
| Primary                       | 2.4   | 3.1    | 3.9    | 2.7    |
| Secondary                     | 34.8  | 38.5   | 38.8   | 35.0   |
| Higher ≤4 years               | 37.8  | 35.6   | 37.3   | 36.1   |
| Higher >4 years               | 21.3  | 19.2   | 20.5   | 22.2   |
| Missing                       | 3.7   | 3.6    | 3.7    | 3.9    |
| Parity                        |       |        |        |        |
| Nulliparous                   | 54.9  | 61.7   | 68.2   | 70.7   |
| Multiparous                   | 45.1  | 38.3   | 31.8   | 29.3   |
| Smoking                       |       |        |        |        |
| No                            | 90.9  | 89.3   | 85.8   | 85.6   |
| Yes                           | 8.5   | 10.1   | 13.6   | 13.6   |
| Missing                       | 0.7   | 0.6    | 0.6    | 0.7    |
| Pre-pregnancy body mass index |       |        |        |        |
| <20                           | 12.4  | 12.8   | 15.6   | 19.1   |
| 20–24.9                       | 54.9  | 49.9   | 50.8   | 55.6   |
| 25–29.9                       | 21.0  | 22.0   | 19.0   | 15.2   |
| ≥30                           | 9.2   | 12.6   | 11.8   | 7.6    |
| Missing                       | 2.5   | 2.7    | 2.9    | 2.4    |
| Mental distress               |       |        |        |        |

|                         |      |      |      |      |
|-------------------------|------|------|------|------|
| No                      | 93.3 | 92.3 | 91.3 | 92.3 |
| Yes                     | 6.8  | 7.7  | 8.7  | 7.7  |
| Adult physical violence |      |      |      |      |
| No                      | 85.5 | 83.9 | 83.6 | 84.7 |
| Yes                     | 14.5 | 16.1 | 16.4 | 15.3 |
| Child physical violence |      |      |      |      |
| No                      | 94.5 | 94.4 | 94.1 | 94.3 |
| Yes                     | 5.5  | 5.6  | 5.9  | 5.5  |
| Adult emotional abuse   |      |      |      |      |
| No                      | 83.6 | 82.1 | 81.3 | 82.5 |
| Yes                     | 16.4 | 17.9 | 18.7 | 17.5 |
| Child emotional abuse   |      |      |      |      |
| No                      | 86.2 | 85.1 | 84.7 | 85.5 |
| Yes                     | 13.8 | 14.9 | 15.3 | 14.5 |

The prevalence of adverse neonatal outcomes was generally highest in the youngest (<20 y) and the oldest age groups ( $\geq 35$  y) among smokers and women with primary school education.

A BMI  $\geq 30$  was associated with PTB and LBW and BMI <20 with SGA. Women who reported mental distress also reported more PTB, LBW and SGA.

Among the 76 870 women enrolled, 9263 (12.1%) reported a history of mild sexual violence, 2102 (2.8%) moderate and 2746 (3.5%) severe. Women with a history of sexual violence were significantly younger and they were more likely to have primary school education. Additionally, these women more frequently reported smoking, a BMI  $\geq 30$  and mental distress. These women more often experienced other types of violence both as children and adults (data not provided in tables).

A lower gestational age at birth was observed for newborns from women who reported moderate and severe sexual violence with approximately two days when birth was provider-initiated (Table 2).

Table 2. Differences in gestational age for spontaneous and provider-initiated start of birth and birth weight for non-exposed women and women exposed to mild, moderate and severe sexual violence

|                                 | N= 76 870<br>(%) | Mean       | Crude estimate<br>$\beta$ (95% CI) | Adjusted estimate<br>$\beta$ (95% CI)* |
|---------------------------------|------------------|------------|------------------------------------|----------------------------------------|
| <b>Gestational age</b>          |                  |            |                                    |                                        |
| No sexual violence              | 62 699 (81.6)    | 279.7 days | 1                                  | 1                                      |
| <i>Mild sexual violence</i>     |                  |            |                                    |                                        |
| Spontaneous start               | 7323 (11.5)      | 279.9 days | 0.09 (-0.16; 0.33)                 | 0.22 (-0.04; -0.48)                    |
| Provider-initiated start        | 1940 (12.5)      | 280.3 days | 0.36 (-0.37; 1.08)                 | 0.64 (-0.11; 1.39)                     |
| <i>Moderate sexual violence</i> |                  |            |                                    |                                        |
| Spontaneous start               | 1670 (2.7)       | 279.3 days | -0.40 (-0.87; 0.06)                | -0.28 (-0.78; 0.21)                    |
| Provider-initiated start        | 492 (3.2)        | 277.6 days | -2.13 (-3.41; -0.84)               | -2.02 (-3.39; -0.67)                   |
| <i>Severe sexual violence</i>   |                  |            |                                    |                                        |
| Spontaneous start               | 2048 (3.3)       | 278.7 days | -0.91 (-1.37; -0.44)               | -0.65 (-1.15; -0.16)                   |
| Provider-initiated start        | 698 (4.5)        | 277.5 days | -2.24 (-3.47; -1.01)               | -1.92 (-3.22; -0.62)                   |
| <b>Birth weight</b>             |                  |            |                                    |                                        |
| No sexual violence              | 62 699 (81.6)    | 3594 g     | 1                                  | 1                                      |
| Mild sexual violence            | 9263 (12.1)      | 3597 g     | 2.03 (-9.26; 13.32)                | 0.04 (-9.16; 9.23)**                   |
| Moderate sexual violence        | 2102 (2.8)       | 3582 g     | -13.61 (-34.74; 7.51)              | 6.11 (-11.30; 23.52)**                 |
| Severe sexual violence          | 2746 (3.6)       | 3556 g     | -38.33 (-59.17; -17.49)            | -0.76 (-18.05; 16.53)**                |

\*Adjusted for maternal age, parity, education, smoking, body mass index and mental distress

\*\*Additional adjustment for gestational age

Among women with a spontaneous start of birth, the gestational age was approximately one half of a day shorter when women reported severe sexual violence. These findings were significant in an adjusted analysis. A crude analysis showed that women who reported a history of severe violence delivered on average 38.3 g lighter children, a difference that disappeared when controlling for gestational age, mother's age, parity, education, smoking, BMI and mental distress. There were no differences regarding birth weight between women with a history of mild or moderate sexual violence compared with non-abused women.

Results from the logistic regression analysis are presented in Table 3.

Table 3. Odds of preterm birth (PTB), low birth weight (LBW) and small for gestational age (SGA) with 95% confidence intervals (CI) according to the different levels of sexual violence

|            | N (%) | Prevalence<br>(%) | Crude odds ratio<br>(95% CI) | Adjusted odds ratio<br>(95% CI)* |
|------------|-------|-------------------|------------------------------|----------------------------------|
| <b>PTB</b> |       | <b>3620 (4.7)</b> |                              |                                  |

|                          |               |                   |                  |                  |
|--------------------------|---------------|-------------------|------------------|------------------|
| No sexual violence       | 62 699 (81.6) | 2931 (4.7)        | 1                | 1                |
| Mild sexual violence     | 9263 (12.1)   | 412 (4.4)         | 0.95 (0.85-1.06) | 0.93 (0.83-1.03) |
| Moderate sexual violence | 2102 (2.8)    | 115 (5.3)         | 1.15 (0.95-1.39) | 1.14 (0.93-1.39) |
| Severe sexual violence   | 2746 (3.6)    | 162 (5.9)         | 1.28 (1.08-1.51) | 1.15 (0.97-1.37) |
| <b>LBW</b>               |               | <b>2107 (2.7)</b> |                  |                  |
| No sexual violence       | 62 699 (81.6) | 1681 (2.7)        | 1                | 1                |
| Mild sexual violence     | 9263 (12.1)   | 257 (2.8)         | 1.04 (0.91-1.18) | 0.98 (0.85-1.12) |
| Moderate sexual violence | 2102 (2.8)    | 75 (3.5)          | 1.30 (1.03-1.65) | 1.19 (0.93-1.53) |
| Severe sexual violence   | 2746 (3.6)    | 94 (3.4)          | 1.29 (1.04-1.59) | 1.07 (0.85-1.34) |
| <b>SGA</b>               |               | <b>6257 (8.1)</b> |                  |                  |
| No sexual violence       | 62 699 (81.6) | 5061 (8.1)        | 1                | 1                |
| Mild sexual violence     | 9263 (12.1)   | 768 (8.3)         | 1.03 (0.95-1.12) | 1.00 (0.91-1.08) |
| Moderate sexual violence | 2102 (2.8)    | 178 (8.3)         | 1.02 (0.87-1.19) | 0.95 (0.80-1.12) |
| Severe sexual violence   | 2746 (3.6)    | 250 (9.1)         | 1.14 (1.00-1.30) | 1.05 (0.91-1.21) |

\*Adjusted for maternal age, parity, education, smoking, body mass index and mental distress

Women who reported severe sexual violence had higher odds of PTB, LBW and SGA in a crude analysis, an association that was attenuated and no longer significant when adjusted for maternal age, parity, education, smoking, BMI and mental distress. Other types of violence, both as a child and adult, had small attenuating effects on the odds ratios and were not included in the final models.

The sensitivity analysis, in which we examined the association between a history of sexual violence and SGA and LBW in a sub-sample of women who had a spontaneous term birth, showed the same pattern as in the total sample reported in Table 3. Women who reported severe sexual violence had higher odds of LBW and SGA in a crude analysis but not in the adjusted analysis (Data not provided in tables).

A crude analysis was used to examine if the timing of the violence was associated with adverse outcome. Women who reported recent sexual violence had a higher risk for LBW (OR 1.60 95% CI 1.04-2.17) compared with non-abused women. The association was no longer significant in the adjusted analysis. In our study, 684 (0.9%) women reported recent

1  
2  
3 sexual violence (mild, moderate and severe) and 13 487 (17.5%) previous sexual violence  
4  
5 (Supplementary Table S1). There was no association between recent severe sexual violence  
6  
7 (rape) and adverse neonatal outcome (Supplementary Table S2). There were 66 (0.1%)  
8  
9 women who reported rape during pregnancy or the last 6 or 12 months in this study.  
10  
11

## 12 13 14 **DISCUSSION**

### 15 16 **Main outcome**

17  
18 We found that moderate and severe sexual violence were associated with a reduction in  
19  
20 gestational age at birth. The largest effect was observed when birth was provider-initiated  
21  
22 among women exposed to moderate or severe violence. These women had an approximately  
23  
24 two-day reduction in gestational age. There was no significant association between sexual  
25  
26 violence and PTB, LBW or SGA in the adjusted analysis.  
27  
28

### 29 30 31 **Strength**

32  
33 This study, based on information from a large population-based study, the Norwegian Mother  
34  
35 and Child Cohort study (MoBa), which is linked to the Medical Birth Registry (MBRN), gave  
36  
37 a unique opportunity to assess the association between sexual violence and outcome for  
38  
39 newborns. The validity of the data in the MoBa has in earlier research been described as  
40  
41 sufficient for large-scale epidemiologic studies.[29, 30] Our study was strengthened by the  
42  
43 fact that the information on the different outcome variables was collected prospectively from  
44  
45 the quality-assessed MBRN.[31] The outcomes in this study are part of a complex  
46  
47 phenomenon that has several different risk factors. [2] The setting in this study, with small  
48  
49 social and health inequalities, may therefore be suitable to isolate the effect of sexual violence  
50  
51 on adverse neonatal outcomes.  
52  
53  
54  
55  
56  
57  
58  
59  
60

## Limitations

There are also limitations to our study. The participation rate of 40.6% in MoBa is low, and MoBa suffers to some extent from selection bias. The women included in the study are older, have more education, smoke less and are less likely to be of a non-Norwegian origin than the Norwegian population. A recent study has found that this may affect the prevalence estimates, but there was no evidence that the exposure-outcome associations were affected by selection bias.[32] Furthermore, as preterm birth is associated with ethnicity, the ethnic homogeneous sample in MoBa may limit the generalisability of our findings. The lack of a validated instrument for measuring the exposure is a limitation to this study, and violence measured in modules as part of a larger questionnaire, as that in MoBa, may achieve a lower disclosure rate.[5] However, a similar prevalence to that found in our study was reported in a Nordic study examining sexual violence and health.[33]

To our knowledge, no studies have examined the influence of lifetime sexual violence reported during pregnancy on the gestational age at birth for newborns. There were minor differences in the gestational age between abused and non-abused women in this study, and the clinical importance of our findings for the health of the newborn is most likely limited. However, the difference between the provider-initiated and spontaneous initiation of birth may be of interest. Shorter provider-initiated pregnancies may suggest an increase in elective inductions and elective caesarean sections for those exposed to violence. This is supported by others [34, 35] and in our previous study on sexual violence and maternal outcome.[36] Studies have emphasised the meaning of control for abused women when giving birth,[37] and choosing a planned start of birth may help the abused women remain in control.

1  
2  
3 Unlike the current meta-analysis mentioned in a WHO report (not yet published),[5] we did  
4  
5 not find sexual violence to be associated with PTB and LBW in adjusted analysis. To our  
6  
7 knowledge, no study has found an association between violence and SGA. The studies  
8  
9 included in the meta-analysis investigated both sexual and physical intimate partner violence,  
10  
11 in contrast to our study, which investigated lifetime sexual violence. Studies on the health  
12  
13 effects of non-partner sexual violence are limited with less robust data than for intimate  
14  
15 partner violence.[5] Our data from the MoBa does not differentiate between intimate partner  
16  
17 violence and sexual abuse by non-partners, but it is not unlikely that the question about severe  
18  
19 sexual violence (rape) primarily reflects non-partner sexual abuse. Some studies have shown  
20  
21 significant associations for adverse neonatal outcomes in a crude analysis; these became non-  
22  
23 significant when adjusting for socio-demographic and behavioural factors,[38, 39] as ours.  
24  
25 The exposure in these studies involved intimate partner violence during pregnancy, and the  
26  
27 study by Webster et al. [39] also included lifetime physical violence.  
28  
29  
30  
31  
32  
33

34 Several pathways between sexual violence and adverse neonatal outcomes are suggested, both  
35  
36 direct and indirect.[5] The direct pathway of violence during pregnancy can lead to a preterm  
37  
38 birth, and examples of indirect pathways include more health-risk behaviours, depression and  
39  
40 stress/anxiety.[5, 40] Both experienced violence and living in an abusive environment can  
41  
42 cause increased stress levels, which could be on the pathway between abuse and adverse  
43  
44 neonatal outcome. Maternal exposure to stress can influence the hypothalamic pituitary axis  
45  
46 (HPA) hormones, and it is suggested that changes in these hormones may cause negative  
47  
48 outcomes, such as a reduction in gestational age and foetal growth restriction.[4, 41]  
49  
50

51 The prevalence of abuse during pregnancy is small in our study and may have decreased the  
52  
53 power to detect an association between violence during pregnancy and adverse neonatal  
54  
55 outcomes, an association that is supported by other studies.[10, 14, 42, 43] In our study,  
56  
57  
58  
59  
60



1  
2  
3 sexual violence was assessed approximately in gestational week 17, and events of violence  
4  
5 after that may have been missed. The studies that report the highest prevalence of violence  
6  
7 have measured this several times during pregnancy. [6] Studies have reported a violence  
8  
9 prevalence during pregnancy of between 3 to 19%. [6, 44] A direct comparison to our study is  
10  
11 difficult because these numbers estimate both physical and sexual abuse during pregnancy;  
12  
13 they may suggest that sexual violence during pregnancy is underreported in our study.  
14  
15 Underreporting among the non-exposed may have caused a misclassification that has  
16  
17 diminished the associations between sexual violence and neonatal outcomes in our study.  
18  
19 Living in an abusive relationship may also stop women from disclosing the violence.  
20  
21 However, our prevalence of recent sexual (0.9%) violence is similar to the prevalence of 1%  
22  
23 reported in a national population based study on violence among Norwegian women. [45] This  
24  
25 number reflects the prevalence of sexual violence reported during the last year, not especially  
26  
27 among pregnant women.  
28  
29  
30  
31  
32  
33

### 34 **Conclusion**

35  
36 Overall, our findings provide no evidence for an association between lifetime sexual violence  
37  
38 and adverse neonatal outcomes. A small significant effect on the gestational age at birth was  
39  
40 detected, but the clinical importance of this is most likely limited for the health of the  
41  
42 newborn. PTB, LBW and SGA all have complex origins with multiple possible pathways. [1,  
43  
44 2] Although we did not find an association between sexual violence and PTB, LBW or SGA  
45  
46 in adjusted analyses, crude analyses in our study suggested that sexual violence may be a risk  
47  
48 factor for adverse neonatal outcomes for some women; however, for the majority of women,  
49  
50 the relationship is confounded by other risk factors. Antenatal care is one of the most  
51  
52 important entry points in which women seek health care without necessarily disclosing  
53  
54 ongoing exposure to violence or a history of sexual violence. It is recommended that  
55  
56  
57  
58  
59  
60

1  
2  
3 caregivers and clinicians ask women about exposure to violence when assessing conditions  
4  
5 that may be complicated by violence,[46] and more knowledge about this conditions is  
6  
7 needed. Additionally, antenatal care may offer opportunities for women to receive help, both  
8  
9 if they are exposed to violence and in providing assistance to change behavioural factors  
10  
11 contributing to adverse outcomes.  
12

### 13 14 15 16 **Competing interests**

17  
18 None.  
19

### 20 21 22 23 **Contributions to authorship**

24  
25 LH participated in the conception and design of the study, performed the analysis and drafted  
26  
27 the manuscript. BS participated in the conception of the study, advised on the statistical  
28  
29 analyses and drafting of the manuscript. SV advised on the statistical analyses and the drafting  
30  
31 of the manuscript. ML participated in the conception and design of the study, advised on the  
32  
33 statistical analyses and participated in drafting the manuscript. All authors read and approved  
34  
35 the final version.  
36  
37  
38  
39

### 40 41 **Funding**

42  
43 The Norwegian Mother and Child Cohort Study is supported by the Norwegian Ministry of  
44  
45 Health and the Ministry of Education and Research, NIH/NIEHS (contract no N01-ES-  
46  
47 75558), NIH/NINDS (grant no.1 U01 NS 047537-01 and grant no.2 U01 NS 047537-06A1),  
48  
49 and the Norwegian Research Council/FUGE (grant no. 151918/S10). The first author of this  
50  
51 article is supported by The Research Council of Norway (grant no. 204292/H10), and the  
52  
53 second author is supported by the South-Eastern Norway Regional Health Authority (grant  
54  
55 no. 2012010).  
56  
57  
58  
59  
60

## Acknowledgement

We are grateful to all the participating families in Norway who take part in this ongoing cohort study.

## Data Sharing Statement

No additional data are available.

## Reference List

- (1) Green NS, Damus K, Simpson JL, et al. Research agenda for preterm birth: recommendations from the March of Dimes. *Am J Obstet Gynecol* 2005;193:626-35.
- (2) March of Dimes, PMNCH, Save The Children, WHO. Born Too Soon: The Global Action Report on Preterm Birth. Geneva: World Health Organization 2012
- (3) Wilcox AJ. On the importance-and the unimportance-of birth weight. *Int J Epidemiol* 2001;30:1233-41.
- (4) Lazinski MJ, Shea AK, Steiner M. Effects of maternal prenatal stress on offspring development: a commentary. *Arch Womens Ment Health* 2008;11:363-75.
- (5) Garcia-Moreno C, Pallitto C, Devries K, et al. Global and regional estimates of violence against women: prevalence and health effects of intimate partner violence and non-partner sexual violence. Geneva: World Health Organization; 2013.
- (6) Campbell J, Garcia-Moreno C, Sharps P. Abuse During Pregnancy in Industrialized and Developing Countries. *Violence Against Women* 2004;10:770-89.
- (7) Garcia-Moreno C, Jansen HA, Ellsberg M, et al. Prevalence of intimate partner violence: findings from the WHO multi-country study on women's health and domestic violence. *Lancet* 2006;368:1260-9.
- (8) Sanchez SE, Alva AV, Diez CG, et al. Risk of spontaneous preterm birth in relation to maternal exposure to intimate partner violence during pregnancy in Peru. *Matern Child Health J* 2013;17:485-92.
- (9) Leeners B, Stiller R, Block E, et al. Pregnancy complications in women with childhood sexual abuse experiences. *J Psychosom Res* 2010;69:503-10.
- (10) Nunes MA, Camey S, Ferri CP, et al. Violence during pregnancy and newborn outcomes: a cohort study in a disadvantaged population in Brazil. *Eur J Public Health* 2011;21(1):92-7.
- (11) Rodrigues T, Rocha L, Barros H. Physical abuse during pregnancy and preterm delivery. *Am J Obstet Gynecol* 2008;198:171-6.
- (12) Noll JG, Schulkin J, Trickett PK, et al. Differential pathways to preterm delivery for sexually abused and comparison women. *J Pediatr Psychol* 2007;32:1238-48.

- 1
- 2
- 3 (13) Silverman JG, Decker MR, Reed E, et al. A. Intimate partner violence victimization
- 4 prior to and during pregnancy among women residing in 26 U.S. states: associations
- 5 with maternal and neonatal health. *Am J Obstet Gynecol* 2006;195:140-8.
- 6
- 7 (14) Murphy CC, Schei B, Myhr TL, et al. Abuse: a risk factor for low birth weight? A
- 8 systematic review and meta-analysis. *CMAJ* 2001;164:1567-72.
- 9
- 10 (15) Fried LE, Cabral H, Amaro H, et al. Lifetime and during pregnancy experience of
- 11 violence and the risk of low birth weight and preterm birth. *J Midwifery Womens*
- 12 *Health* 2008 ;53:522-8.
- 13
- 14 (16) Janssen PA, Holt VL, Sugg NK, et al. Intimate partner violence and adverse
- 15 pregnancy outcomes: a population-based study. *Am J Obstet Gynecol* 2003;188:1341-
- 16 7.
- 17
- 18 (17) Urquia ML, O'Campo PJ, Heaman MI, et al. Experiences of violence before and
- 19 during pregnancy and adverse pregnancy outcomes: an analysis of the Canadian
- 20 Maternity Experiences Survey. *BMC Pregnancy Childbirth* 2011;11:42.
- 21
- 22 (18) Altarac M, Strobino D. Abuse during pregnancy and stress because of abuse during
- 23 pregnancy and birthweight. *J Am Med Womens Assoc* 2002;57:208-14.
- 24
- 25 (19) Cokkinides VE, Coker AL, Sanderson M, et al. Physical violence during pregnancy:
- 26 maternal complications and birth outcomes. *Obstet Gynecol* 1999;93:661-6.
- 27
- 28 (20) Grimstad H, Schei B, Backe B, et al. Physical abuse and low birthweight: a case-
- 29 control study. *Br J Obstet Gynaecol* 1997;104:1281-7.
- 30
- 31 (21) Kaye DK, Mirembe FM, Bantebya G, et al. Domestic violence during pregnancy and
- 32 risk of low birthweight and maternal complications: a prospective cohort study at
- 33 Mulago Hospital, Uganda. *Trop Med Int Health* 2006;11:1576-84.
- 34
- 35 (22) Magnus P, Irgens LM, Haug K, et al. Cohort profile: the Norwegian Mother and Child
- 36 Cohort Study (MoBa). *Int J Epidemiol* 2006;35:1146-50.
- 37
- 38 (23) Lukasse M, Henriksen L, Vangen S, et al. Sexual violence and pregnancy-related
- 39 physical symptoms. *BMC Pregnancy Childbirth* 2012;12:83.
- 40
- 41 (24) Henriksen L, Vangen S, Schei B, et al. Sexual violence and antenatal hospitalization.
- 42 *Birth* 2013;40:281-8.
- 43
- 44 (25) Skjaerven R, Gjessing HK, Bakketeig LS. et al. Birthweight by gestational age in
- 45 Norway. *Acta Obstet Gynecol Scand* 2000;79:440-9.
- 46
- 47 (26) Strand BH, Dalgard OS, Tambs K, et al. Measuring the mental health status of the
- 48 Norwegian population: a comparison of the instruments SCL-25, SCL-10, SCL-5 and
- 49 MHI-5 (SF-36). *Nord J Psychiatry* 2003;57:113-8.
- 50
- 51 (27) Field A. Discovering statistics using SPSS. Los Angeles: SAGE; 2009.
- 52
- 53 (28) Veierød MB, Lydersen S, Laake P, et at. Medical statistics: in clinical and
- 54 epidemiological research. Oslo: Gyldendal akademisk; 2012.
- 55
- 56
- 57
- 58
- 59
- 60

- 1  
2  
3 (29) Kvalvik LG, Nilsen RM, Skjaerven R, et al. Self-reported smoking status and plasma  
4 cotinine concentrations among pregnant women in the Norwegian Mother and Child  
5 Cohort Study. *Pediatr Res* 2012 ;72:101-7.  
6  
7 (30) Furu K, Karlstad O, Skurtveit S, et al. High validity of mother-reported use of  
8 antiasthmatics among children: a comparison with a population-based prescription  
9 database. *J Clin Epidemiol* 2011;64:878-84.  
10  
11 (31) Irgens LM. The Medical Birth Registry of Norway. Epidemiological research and  
12 surveillance throughout 30 years. *Acta Obstet Gynecol Scand* 2000;7:435-9.  
13  
14 (32) Nilsen RM, Vollset SE, Gjessing HK, et al. Self-selection and bias in a large  
15 prospective pregnancy cohort in Norway. *Paediatr Perinat Epidemiol* 2009 23:597-  
16 608.  
17  
18 (33) Hilden M, Schei B, Swahnberg K, et al. A history of sexual abuse and health: a Nordic  
19 multicentre study. *BJOG* 2004;111:1121-7.  
20  
21 (34) Nerum H, Halvorsen L, Straume B, et al. Different labour outcomes in primiparous  
22 women that have been subjected to childhood sexual abuse or rape in adulthood: a  
23 case-control study in a clinical cohort. *BJOG* 2013;120:487-495.  
24  
25 (35) Lukasse M, Vangen S, Oian P, et al. Childhood abuse and caesarean section among  
26 primiparous women in the Norwegian Mother and Child Cohort Study. *BJOG*  
27 2010;117:1153-7.  
28  
29 (36) Henriksen L, Schei B, Vangen S, et al. Sexual violence and mode of delivery: a  
30 population-based cohort study. *BJOG*. In press 2014.  
31  
32 (37) Montgomery E. Feeling Safe: A Metasynthesis of the Maternity Care Needs of  
33 Women Who Were Sexually Abused in Childhood. *Birth* 2013;40:88-95.  
34  
35 (38) Campbell J, Torres S, Ryan J, et al. Physical and nonphysical partner abuse and other  
36 risk factors for low birth weight among full term and preterm babies: a multiethnic  
37 case-control study. *Am J Epidemiol* 1999;150:714-26.  
38  
39 (39) Webster J, Chandler J, Battistutta D. Pregnancy outcomes and health care use: effects  
40 of abuse. *Am J Obstet Gynecol* 1996;174:760-7.  
41  
42 (40) Leeners B, Neumaier-Wagner P, Quarg AF, et al. Childhood sexual abuse (CSA)  
43 experiences: an underestimated factor in perinatal care. *Acta Obstet Gynecol Scand*  
44 2006;85:971-6.  
45  
46 (41) Valladares E, Pena R, Ellsberg M, et al. Neuroendocrine response to violence during  
47 pregnancy--impact on duration of pregnancy and fetal growth. *Acta Obstet Gynecol*  
48 *Scand* 2009;88:818-23.  
49  
50 (42) Faramarzi M, Esmaelzadeh S, Mosavi S. Prevalence, maternal complications and birth  
51 outcome of physical, sexual and emotional domestic violence during pregnancy. *Acta*  
52 *Med Iran* 2005;43:115-22.  
53  
54  
55  
56  
57  
58  
59  
60

- 1  
2  
3 (43) Valladares E, Ellsberg M, Pena R, et al. Physical partner abuse during pregnancy: a  
4 risk factor for low birth weight in Nicaragua. *Obstet Gynecol* 2002;100:700-5.  
5  
6 (44) Sharps PW, Laughon K, Giangrande SK. Intimate partner violence and the  
7 childbearing year: maternal and infant health consequences. *Trauma Violence Abuse*  
8 *2007;8:105-16.*  
9  
10 (45) Neroien AI, Schei B. Partner violence and health: results from the first national study  
11 on violence against women in Norway. *Scand J Public Health* 2008;36:161-8.  
12  
13 (46) World health organisation. Responding to intimate partner violence and sexual  
14 violence against women: WHO clinical and policy guidelines. Geneva: WHO; 2013.  
15  
16  
17  
18  
19  
20  
21  
22  
23  
24  
25  
26  
27  
28  
29  
30  
31  
32  
33  
34  
35  
36  
37  
38  
39  
40  
41  
42  
43  
44  
45  
46  
47  
48  
49  
50  
51  
52  
53  
54  
55  
56  
57  
58  
59  
60

Figure 1. Inclusion and exclusion process

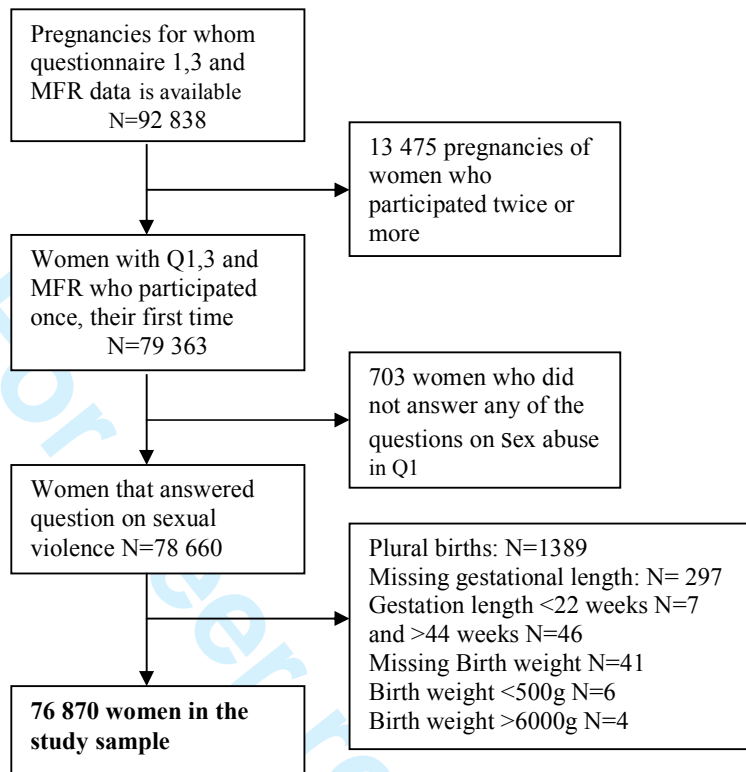

Table S1: Odds of preterm birth (PTB), low birth weight (LBW) and small for gestational age (SGA) with 95% confidence intervals (CI) according to previous and recent sexual violence

|                          | N (%)         | Prevalence (%)    | Crude odds ratio (95% CI) | Adjusted odds ratio (95% CI) |
|--------------------------|---------------|-------------------|---------------------------|------------------------------|
| <b>PTB</b>               |               | <b>3620 (4.7)</b> |                           |                              |
| No sexual violence       | 62 699 (81.6) | 2931 (4.7)        | 1                         | 1                            |
| Previous sexual violence | 13487 (17.5)  | 650 (4.8)         | 1.03 (0.95-1.13)          | 0.99 (0.90-1.09)             |
| Recent sexual violence   | 684 (0.9)     | 39 (5.7)          | 1.23 (0.89-1.71)          | 1.17 (0.83-1.65)             |
| <b>LBW</b>               |               | <b>2107 (2.7)</b> |                           |                              |
| No sexual violence       | 62 699 (81.6) | 1681 (2.7)        | 1                         | 1                            |
| Previous sexual violence | 13 487 (17.5) | 397 (2.9)         | 1.10 (0.99-1.23)          | 1.0 (0.86-1.12)              |
| Recent sexual violence   | 684 (0.9)     | 29 (4.2)          | 1.60 (1.04-2.33)          | 1.45 (0.97-2.17)             |
| <b>SGA</b>               |               | <b>6257 (8.1)</b> |                           |                              |
| No sexual violence       | 62 699 (81.6) | 5061 (8.1)        | 1                         | 1                            |
| Previous sexual violence | 13 487 (17.5) | 1136 (8.4)        | 1.05 (0.98-1.12)          | 0.98 (0.92-1.06)             |
| Recent sexual violence   | 684 (0.9)     | 60 (8.8)          | 1.10 (0.84-1.43)          | 1.18 (0.90-1.56)             |

\*Adjusted for maternal age, parity, education, smoking, body mass index and mental distress



Table S2: Odds of preterm birth (PTB), low birth weight (LBW) and small for gestational age (SGA) with 95% confidence intervals (CI) according to previous and recent severe violence (rape)

|               | N (%)         | Prevalence (%)    | Crude odds ratio (95% CI) | Adjusted odds ratio (95% CI)* |
|---------------|---------------|-------------------|---------------------------|-------------------------------|
| <b>PTB</b>    |               | <b>3620 (4.7)</b> |                           |                               |
| No rape       | 74 124 (96.4) | 3458 (4.7)        | 1                         | 1                             |
| Previous rape | 2680 (3.5)    | 157 (5.9)         | 1.27 (1.08-1.50)          | 1.14 (0.97-1.36)              |
| Recent rape   | 66 (0.1)      | 5 (7.6)           | 1.68 (0.67-4.17)          | 1.72 (0.68-4.33)              |
| <b>LBW</b>    |               | <b>2107 (2.7)</b> |                           |                               |
| No rape       | 74 124 (96.4) | 2013(2.7)         | 1                         | 1                             |
| Previous rape | 2680 (3.5)    | 91 (3.4)          | 1.26 (1.02-1.56)          | 1.06 (0.84-1.33)              |
| Recent rape   | 66 (0.1)      | 3 (4.5)           | 1.71 (0.54-5.44)          | 1.55 (0.48-5.02)              |
| <b>SGA</b>    |               | <b>6257 (8.1)</b> |                           |                               |
| No rape       | 74 124 (96.4) | 6007 (8.1)        | 1                         | 1                             |
| Previous rape | 2680 (3.5)    | 247 (9.2)         | 1.15 (1.01-1.32)          | 1.06 (0.92-1.23)              |
| Recent rape   | 66 (0.1)      | 3 (4.5)           | 0.54 (0.17-1.72)          | 0.55 (0.17-1.79)              |

\*Adjusted for maternal age, parity, education, smoking, body mass index and mental distress

STROBE 2007 (v4) Statement—Checklist of items that should be included in reports of cohort studies

| Section/Topic            | Item # | Recommendation                                                                                                                                                                                                                                | Reported on page #     |
|--------------------------|--------|-----------------------------------------------------------------------------------------------------------------------------------------------------------------------------------------------------------------------------------------------|------------------------|
| Title and abstract       | 1      | (a) Indicate the study’s design with a commonly used term in the title or the abstract                                                                                                                                                        | page 1                 |
|                          |        | (b) Provide in the abstract an informative and balanced summary of what was done and what was found                                                                                                                                           | page 2                 |
| <b>Introduction</b>      |        |                                                                                                                                                                                                                                               |                        |
| Background/rationale     | 2      | Explain the scientific background and rationale for the investigation being reported                                                                                                                                                          | page 3 and             |
| Objectives               | 3      | State specific objectives, including any prespecified hypotheses                                                                                                                                                                              | page 4                 |
| <b>Methods</b>           |        |                                                                                                                                                                                                                                               |                        |
| Study design             | 4      | Present key elements of study design early in the paper                                                                                                                                                                                       | From page 4            |
| Setting                  | 5      | Describe the setting, locations, and relevant dates, including periods of recruitment, exposure, follow-up, and data collection <b>in addition reference is given for further reading of detailed information on MoBa study (referece 22)</b> | Page 4                 |
| Participants             | 6      | (a) Give the eligibility criteria, and the sources and methods of selection of participants. Describe methods of follow-up                                                                                                                    | NA                     |
|                          |        | (b) For matched studies, give matching criteria and number of exposed and unexposed                                                                                                                                                           | NA                     |
| Variables                | 7      | Clearly define all outcomes, exposures, predictors, potential confounders, and effect modifiers. Give diagnostic criteria, if applicable                                                                                                      | Presented on pages 5-7 |
| Data sources/measurement | 8*     | For each variable of interest, give sources of data and details of methods of assessment (measurement). Describe comparability of assessment methods if there is more than one group                                                          | Page 5-7               |
| Bias                     | 9      | Describe any efforts to address potential sources of bias <b>controlling for confounding and covariates</b>                                                                                                                                   | pages 6 and 7.         |
| Study size               | 10     | Explain how the study size was arrived at                                                                                                                                                                                                     | figure 1 and page5     |
| Quantitative variables   | 11     | Explain how quantitative variables were handled in the analyses. If applicable, describe which groupings were chosen and why                                                                                                                  | Page 6                 |
| Statistical methods      | 12     | (a) Describe all statistical methods, including those used to control for confounding                                                                                                                                                         | page 7 and 8           |
|                          |        | (b) Describe any methods used to examine subgroups and interactions                                                                                                                                                                           | page 8                 |
|                          |        | (c) Explain how missing data were addressed                                                                                                                                                                                                   | page 8                 |
|                          |        | (d) If applicable, explain how loss to follow-up was addressed                                                                                                                                                                                | NA                     |
|                          |        | (e) Describe any sensitivity analyses                                                                                                                                                                                                         | page 8                 |
| <b>Results</b>           |        |                                                                                                                                                                                                                                               |                        |
| Participants             | 13*    | (a) Report numbers of individuals at each stage of study—eg numbers potentially eligible, examined for eligibility, confirmed eligible, included in the study, completing follow-up, and analysed <b>All listed in Figure 1</b>               |                        |
|                          |        | (b) Give reasons for non-participation at each stage                                                                                                                                                                                          | Page 5                 |

|                          |     |                                                                                                                                                                                                              |                                                                            |
|--------------------------|-----|--------------------------------------------------------------------------------------------------------------------------------------------------------------------------------------------------------------|----------------------------------------------------------------------------|
|                          |     | (c) Consider use of a flow diagram <a href="#">Figure 1</a>                                                                                                                                                  |                                                                            |
| Descriptive data         | 14* | (a) Give characteristics of study participants (eg demographic, clinical, social) and information on exposures and potential confounders                                                                     | <a href="#">Table 1: page 9 and 10</a>                                     |
|                          |     | (b) Indicate number of participants with missing data for each variable of interest                                                                                                                          | <a href="#">Table 1</a>                                                    |
|                          |     | (c) Summarise follow-up time (eg, average and total amount)                                                                                                                                                  | NA                                                                         |
| Outcome data             | 15* | Report numbers of outcome events or summary measures over time                                                                                                                                               | <a href="#">Table 1</a>                                                    |
| Main results             | 16  | (a) Give unadjusted estimates and, if applicable, confounder-adjusted estimates and their precision (eg, 95% confidence interval). Make clear which confounders were adjusted for and why they were included | <a href="#">Page 6-7, 11 - 12 and Table 2 and 3</a>                        |
|                          |     | (b) Report <i>category</i> boundaries when continuous variables were categorized                                                                                                                             | <a href="#">Page 6 and Table 1</a>                                         |
|                          |     | (c) If relevant, consider translating estimates of relative risk into absolute risk for a meaningful time period                                                                                             |                                                                            |
| Other analyses           | 17  | Report other analyses done—eg analyses of subgroups and interactions, and sensitivity analyses                                                                                                               | <a href="#">page 12-13</a><br><a href="#">Supplementary Tables 1 and 2</a> |
| <b>Discussion</b>        |     |                                                                                                                                                                                                              |                                                                            |
| Key results              | 18  | Summarise key results with reference to study objectives                                                                                                                                                     | <a href="#">page 13</a>                                                    |
| <b>Limitations</b>       |     |                                                                                                                                                                                                              |                                                                            |
| Interpretation           | 20  | Give a cautious overall interpretation of results considering objectives, limitations, multiplicity of analyses, results from similar studies, and other relevant evidence                                   | <a href="#">Page 13-16</a>                                                 |
| Generalisability         | 21  | Discuss the generalisability (external validity) of the study results                                                                                                                                        | <a href="#">Page 14</a>                                                    |
| <b>Other information</b> |     |                                                                                                                                                                                                              |                                                                            |
| Funding                  | 22  | Give the source of funding and the role of the funders for the present study and, if applicable, for the original study on which the present article is based                                                | <a href="#">Page 17</a>                                                    |

\*Give information separately for cases and controls in case-control studies and, if applicable, for exposed and unexposed groups in cohort and cross-sectional studies.

**Note:** An Explanation and Elaboration article discusses each checklist item and gives methodological background and published examples of transparent reporting. The STROBE checklist is best used in conjunction with this article (freely available on the Web sites of PLoS Medicine at <http://www.plosmedicine.org/>, Annals of Internal Medicine at <http://www.annals.org/>, and Epidemiology at <http://www.epidem.com/>). Information on the STROBE Initiative is available at [www.strobe-statement.org](http://www.strobe-statement.org).

# BMJ Open

## Sexual violence and neonatal outcomes: a Norwegian population-based cohort study

|                                 |                                                                                                                                                                                                                                                                                                                                                                                                                                                                                             |
|---------------------------------|---------------------------------------------------------------------------------------------------------------------------------------------------------------------------------------------------------------------------------------------------------------------------------------------------------------------------------------------------------------------------------------------------------------------------------------------------------------------------------------------|
| Journal:                        | <i>BMJ Open</i>                                                                                                                                                                                                                                                                                                                                                                                                                                                                             |
| Manuscript ID:                  | bmjopen-2014-005935.R1                                                                                                                                                                                                                                                                                                                                                                                                                                                                      |
| Article Type:                   | Research                                                                                                                                                                                                                                                                                                                                                                                                                                                                                    |
| Date Submitted by the Author:   | 05-Sep-2014                                                                                                                                                                                                                                                                                                                                                                                                                                                                                 |
| Complete List of Authors:       | Henriksen, Lena; Oslo University Hospital, Department for Women's and Children's Health<br>Schei, Berit; Norwegian University of Science and Technology, Department of Public Health and General Practice, Faculty of Medicine; St Olavs University Hospital, Department of Obstetrics and Gynaecology<br>Vangen, Siri; Oslo University Hospital, Department for Women's and Children's Health<br>Lukasse, Mirjam; Oslo and Akershus University College, Norway, Faculty of Health Sciences |
| <b>Primary Subject Heading</b>: | Obstetrics and gynaecology                                                                                                                                                                                                                                                                                                                                                                                                                                                                  |
| Secondary Subject Heading:      | Obstetrics and gynaecology, Epidemiology                                                                                                                                                                                                                                                                                                                                                                                                                                                    |
| Keywords:                       | Fetal medicine < OBSTETRICS, Maternal medicine < OBSTETRICS, EPIDEMIOLOGY                                                                                                                                                                                                                                                                                                                                                                                                                   |
|                                 |                                                                                                                                                                                                                                                                                                                                                                                                                                                                                             |

SCHOLARONE™  
Manuscripts

Only

**TITLE PAGE**

Title: Sexual violence and neonatal outcomes: a Norwegian population-based cohort study

Lena Henriksen<sup>1</sup>, Berit Schei<sup>2,3</sup>, Siri Vangen<sup>4</sup>, Mirjam Lukasse<sup>5</sup>

Corresponding author: Lena Henriksen<sup>1</sup>, Section of Obstetrics, Department for Women's and Children's Health, Oslo University Hospital, Postboks 4950 Nydalen, N-0424 Oslo, Norway.

E-mail: uxhelz@ous-hf.no Phone: +47 90068485.

Co-authors: Berit Schei<sup>2</sup>, Department of Public Health and General Practice, Faculty of Medicine, The Norwegian University of Science and Technology (NTNU), Håkon Jarls gate 11, N-7489 Trondheim, Norway. <sup>3</sup>Department of Obstetrics and Gynecology, St.Olavs Hospital, Trondheim University Hospital, Postbox 3250 Sluppen, N-7006 Trondheim, Norway.

Siri Vangen<sup>4</sup>, National Resource Centre for Women's Health, Department for Women's and Children's Health, Oslo University Hospital, Postboks 4950 Nydalen, N-0424 Oslo, Norway.

Mirjam Lukasse<sup>5</sup>, Department of Health, Nutrition and Management, Faculty of Health Sciences, Oslo and Akershus University College of Applied Sciences, Postboks 4 St. Olavs plass, N-0130 Oslo, Norway.

Keywords: Sexual violence, rape, premature birth, low birth weight, small for gestational age, MoBa.

Word count: 4249

## ABSTRACT

**Objective:** The objective of this study was to explore the association between sexual violence and neonatal outcomes.

**Design:** National cohort study.

**Setting:** Women were recruited to the Norwegian Mother and Child Cohort Study (MoBa) when attending routine ultrasound examinations from 1999-2008.

**Population:** A total of 76 870 pregnant women.

**Methods:** Sexual violence and maternal characteristics were self-reported in postal questionnaires during pregnancy. Neonatal outcomes were retrieved from the Medical Birth Registry of Norway (MBRN). Risk estimations were performed with linear and logistic regression analysis.

**Outcome measures:** Gestational age at birth, birth weight, preterm birth (PTB), low birth weight (LBW) and small for gestational age (SGA).

**Results:** Of 76 870 women, 18.4% reported a history of sexual violence. A total of 4.7% had a premature birth, 2.7% had children with a birth weight <2500 g and 8.1% children were small for gestational age. Women reporting both moderate and severe sexual violence (rape) had a significantly reduced gestational length (2 days) when the birth was provider-initiated in an analysis adjusted for age, parity, education, smoking, BMI and mental distress. Those exposed to severe sexual violence had a significantly reduced gestational length of 0.51 days with a spontaneous start of birth. Crude estimates showed that severe sexual violence was associated with PTB, LBW and SGA. When controlling for the above-mentioned socio-demographic and behavioural factors, the association was no longer significant.

**Conclusions:** Sexual violence was not associated with adverse neonatal outcomes. Moderate and severe violence had a small but significant effect on gestational age; however, the clinical influence of this finding is most likely limited. Women exposed to sexual violence in this study reported more of the socio-demographic and behavioural factors associated with PTB, LBW and SGA compared with non-abused women.

## STRENGTHS AND LIMITATIONS OF THIS STUDY

- This study was based on information from a large population-based study described as sufficient for large-scale epidemiologic studies.
- All outcomes were collected prospectively from a quality-assessed birth register.
- The setting, with small social and health inequalities, was suitable to isolate the effect of sexual violence on adverse neonatal outcomes.
- A non-validated instrument for measuring of the exposure variable was a limitation to this study.

## INTRODUCTION

Preterm birth is a common and costly health problem.[1, 2] Approximately one in ten babies are born preterm worldwide, and prematurity is considered to be the leading cause of death for newborns.[2] Low birth weight (LBW) can be a consequence of preterm birth (PTB) or intra uterine growth restriction, the latter leading to the birth of small for gestational age (SGA) infants.[3] Research has suggested some biological risk factors for PTB and LBW: multiple pregnancies, a previous preterm birth and uterine or placental abnormalities.[1, 3] Studies also emphasise other, less understood factors for both PTB and LBW.[1] These are maternal age, socio-economic status, ethnicity, maternal weight, substance abuse, stress, depression and violence.[1, 2, 4]

Violence against women is a significant public health problem, and a recent report from the World Health Organization (WHO) state that 35% of women worldwide have experienced either physical and/or sexual intimate partner violence or non-partner sexual violence.[5] A pregnancy does not protect women from violence, and the prevalence of physical or sexual violence during pregnancy ranges from 3.4-11% in high-income countries.[6] It is recognised that violence has an adverse impact on women's physical, sexual, reproductive, and mental health.[5, 7]

A connection between PTB or LBW and violence against women has been reported, but the association is both supported and contradicted.[5, 8-20] Several pathways between sexual violence and adverse pregnancy outcomes are suggested.[5] A direct pathway of sexual violence can result in immediate complications as bleeding and rupture of membranes that can lead to a preterm birth.[5, 16] Other, more indirect pathways are suggested mediated by stress

1  
2  
3 and stress responses [18] or by behavioural factors such as smoking or substance abuse, used  
4  
5 to cope with the negative consequences of violence.[5]  
6  
7

8  
9  
10 Studies have primarily addressed physical abuse during pregnancy and PTB or LBW [8, 10,  
11 11, 16-19, 21] or child sexual abuse and PTB/LBW.[9, 12] Results from a new meta-analysis  
12  
13 published in the recent WHO report [5] have demonstrated an association between intimate  
14  
15 partner violence, including both physical and sexual abuse, and PTB with an adjusted odds  
16  
17 ratio (AOR) of 1.41 (95% CI 1.21-1.62) and AOR of 1.16 (95% CI: 1.02-1.29) with LBW.[5]  
18  
19  
20 However, studies that have investigated the impact of sexual violence on neonatal outcomes  
21  
22 specifically, are limited and few population-based studies with large sample sizes that enable  
23  
24 controlling for confounding variables have been conducted [5, 11] The Norwegian Mother  
25  
26 and Child Cohort Study (MoBa) is a population-based prospective cohort study of pregnant  
27  
28 women that includes measurements of lifetime sexual violence, sexual violence during  
29  
30 pregnancy and other relevant covariates which makes it suitable to examine associations  
31  
32 between sexual violence and neonatal outcome. In this study, we assessed the relationship  
33  
34 between sexual violence and gestational age at birth and birth weight. Additionally, we  
35  
36 explored the associations between sexual violence and PTB, LBW and SGA.  
37  
38  
39  
40  
41

## 42 **METHODS**

43  
44  
45 This study was a sub-project in the MoBa study that was conducted by the Norwegian  
46  
47 Institute of Public health from 1999-2008.[22] All pregnant women in Norway were eligible  
48  
49 to participate in MoBa, and they were recruited during their routine fetal ultrasound  
50  
51 examination. Of the invited women, 40.6% consented to participate. Data were obtained  
52  
53 through extensive self-administered questionnaires that contained demographic factors,  
54  
55 general health, reproductive history and questions about maternal health status during  
56  
57  
58  
59  
60



1  
2  
3 pregnancy. Our analyses were based on questionnaire 1 (Q1), which was completed during  
4 (approximately) gestational week 17, and questionnaire 3 (Q3), which was completed during  
5 (approximately) gestational week 30. Data from MoBa were linked with data from the  
6  
7  
8 Medical Birth Registry of Norway (MBRN), which provided information on pregnancy and  
9  
10  
11 birth outcome. The current study is based on version VI of the quality-assured data files  
12  
13 released for research in 2011. The MoBa study is described in detail elsewhere.[22] The  
14  
15 questionnaires that were used in MoBa are available at the internet-site:  
16  
17  
18 <http://www.fhi.no/studier/den-norske-mor-og-barn-undersokelsen/sporreskjemaer>  
19  
20  
21  
22

### 23 **Study population**

24  
25 This study included women who had a singleton birth between 22 and 44 weeks of gestation,  
26  
27 who completed both Q1 and Q3, had MBRN data available and participated for the first time  
28  
29 (79 363 women). While a pregnancy is the observation unit in the MoBa study, women are  
30  
31 the observation unit in our study; hence, the exclusion of 13 475 pregnancies of women who  
32  
33 participated more than once. We excluded 703 women who did not answer the questions on  
34  
35 sexual violence. Further, we excluded records with missing data on gestational length  
36  
37 (n= 297) and birth weight (n=41). We also excluded 6 children with birth weight <500 g and 4  
38  
39 children with birth weight >6000 g, leaving a study sample of 76 870 women (Figure 1).  
40  
41  
42  
43  
44

### 45 **Ethical statement**

46  
47 Informed consent was obtained from each women participating in the study. The Regional  
48  
49 Committee for Medical Research Ethics (Ref.SAFH 95/313 RTL) and the Norwegian Data  
50  
51 Inspectorate approved the study.  
52  
53  
54  
55  
56  
57  
58  
59  
60

## Variables

### Exposure variable

The exposure variable was collected from Q1. Women were asked if they had been pressured or forced to sexual relations. There were four possible answer options: 1) No, never 2) Yes, pressured, 3) Yes, forced with violence or 4) Yes, raped. A positive answer was defined as having experienced sexual violence. Women with more than one positive answer were classified according to the most severe level reported. The answering options were coded into three levels of severity for the sexual violence: 1) mild (pressured), 2) moderate (forced with violence) and 3) severe (raped). Women could also indicate when the violence had taken place: 1) during this pregnancy, 2) during the last six month before pregnancy or 3) earlier. Approximately 1 700 women who filled out the first version of Q1 had the answering options earlier and during the last 12 month when assessing time. We therefore created the variables previous and recent sexual violence, recent containing sexual violence during last 12 month, including the current pregnancy. Among the women who participated several times we included the first pregnancy only to ensure that the exposure was included only once per woman. More details about the exposure variable can be found in our previous studies [23;24] and in supplementary table 1.

### Outcome variables

All outcome variables were obtained from the MBRN. Gestational age at birth in days was based on ultrasound at (approximately) gestational week 18. For women with no ultrasound, the gestational age was based on the last menstrual period (1.7%). PTB was defined as a gestational age <37, LBW as a birth weight <2500 grams, and SGA was defined as birth weight below the 10th percentile for the gestational age at birth. SGA was calculated using Norwegian specific fetal growth tables by Skjerven et al.[25]

### Adjusting variables

Maternal age, parity, socio-economical status, smoking and body mass index (BMI) were considered as possible confounding factors and were adjusted for. All adjusting variables were taken from the MoBa. In Q1, age was categorised into 5 groups: younger than 20 years, 20–24 years, 25–29 years, 30–34 years or 35 years and older. As a proxy for socio-economic status, we used the woman's education in years (categorised into 4 groups): primary (<12 years), secondary (12 years), higher  $\leq 4$  years (13–16 years) and higher >4 years ( $\geq 17$  years). Parity was dichotomised into nulli- and multiparous women. Smoking was categorised as no smoking or smoking, which included both daily and occasional smoking. BMI was grouped into 4 categories: <20, 20-24.9, 25.0-29.9 or  $\geq 30.0$  kg/m<sup>2</sup>. We also adjusted for mental distress because it is considered to be associated with both the exposure and the outcome.[4,5] Mental distress was measured using 5 items from The Hopkins symptoms checklist (SCL-5) with a cut-off at  $\geq 2.0$  points, as suggested by Strand [26] and obtained from Q3.

Because of the co-occurrence of different violence types,[7] we examined the effect of physical and emotional abuse as a child or as an adult in the multivariable statistical models. Information on adult physical violence was taken from Q1 and consisted of a positive answer to whether women as an adult had experienced being slapped, hit, kicked or otherwise bothered in a physical manner. Child physical violence was taken from Q3 and consisted of a positive answer to the question “Have you experienced physical violence before the age of 18?” Emotional abuse as a child (<18) or as an adult ( $\geq 18$ ) consisted of a positive answer to either, “Someone has over a long period of time systematically tried to subdue, degrade or humiliate you” or “Someone has threatened to hurt you or someone close to you” or both.

1  
2  
3 Previous preterm birth and inadequate antenatal care are considered to be associated with the  
4 exposure and the outcomes.[2, 3, 5] Because a previous preterm birth may be a result of  
5 sexual violence prior to the related pregnancy, we did not control for a previous preterm birth.  
6  
7 In Norway, the majority of women attend antenatal care, a free and a well-integrated part of  
8 the public health system; therefore, we did not control for antenatal care. Ethnicity was not  
9 considered a relevant covariate in our study because the majority of the MoBa participants are  
10 ethnic Norwegian.  
11  
12  
13  
14  
15  
16  
17  
18  
19

### 20 21 **Statistical Analysis**

22 Characteristics were presented as percentages within the entire sample and the different  
23 outcomes. Linear regression was performed to assess differences in birth weight and  
24 gestational age for children born to women with and without a history of mild, moderate and  
25 severe sexual violence. The association between sexual violence and PTB, LBW and SGA  
26 was estimated with crude and adjusted odds ratios using logistic regression analysis. Sexual  
27 violence was analysed as a categorical variable: 1=mild sexual violence, 2= moderate sexual  
28 violence and 3=severe sexual violence with no sexual violence as the reference group. All  
29 analyses were adjusted for maternal age, parity, education, smoking, BMI and mental distress  
30 in the first step. Birth weight was additionally adjusted for gestational age. We further  
31 adjusted for other types of violence in the second step. We initially tested the correlation  
32 between other types of violence and sexual violence because of co-occurrence, and all  
33 Pearson's correlation coefficients were below the generally accepted cut-off of <0.4 for use as  
34 a covariate in the regression analyses.[27] Post protocol, we stratified the sample into  
35 spontaneous start of birth and provider-initiated start of birth (induced start of birth or elective  
36 caesarean section) for gestational age because a provider-initiated start could influence the  
37 time point of birth. Information on how the birth started was taken from MBRN. We  
38  
39  
40  
41  
42  
43  
44  
45  
46  
47  
48  
49  
50  
51  
52  
53  
54  
55  
56  
57  
58  
59  
60

1  
2  
3 additionally performed a sensitivity analysis in which we examined the association between  
4 sexual violence and SGA and LBW among women who had a spontaneous birth at term ( $\geq 37$   
5 weeks) because we wanted to examine the effect of violence in a group of women who were  
6 considered to be low risk according to gestational age and start of birth. When we examined  
7 the timing of the sexual violence, we compared women who were exposed to recent sexual  
8 violence (within the last 12 months) and those exposed to previous sexual violence to non-  
9 abused women. We also examined the timing among women reporting recent and previous  
10 severe sexual violence (rape) for all outcomes. The prevalence of missing data was generally  
11 low with 2.5% for BMI, 3.7% for education, and 0.7% for smoking during pregnancy.  
12 Because of this, no imputing methods for missing data were used,[28] except for the missing  
13 data for the SCL-5 (3.2%), which were replaced by the series mean. The results of the logistic  
14 regression analyses remained approximately the same when performed with the complete  
15 exclusion of missing data compared with using the imputed missing data for SCL-5.  
16  
17  
18  
19  
20  
21  
22  
23  
24  
25  
26  
27  
28  
29  
30  
31  
32  
33

34 The comparison group for all analyses was women not reporting any sexual violence. All  
35 analyses were performed with the statistical package SPSS for WINDOWS (SPSS Inc.,  
36 Chicago, IL, USA) version 18. P-values  $< 0.05$  were considered statistically significant.  
37  
38  
39  
40  
41  
42

## 43 RESULTS

44  
45 The mean gestational age at birth in the total sample was 279.6 days (standard deviation 11.9  
46 days), and the mean birth weight was 3592.7 grams (standard deviation 547.1 g). Table 1  
47 displays the characteristics in the total sample and by the different outcomes.  
48  
49  
50

51 Table 1. Background characteristics in the total sample and by preterm birth (PTB): gestational age  $< 37$ ,  
52 low birth weight (LBW): weight  $< 2500$  g and small for gestational age (SGA) weight below the 10<sup>th</sup> percentile  
53 by gestational age at birth in the Mother and Child Cohort  
54

|  | Total    | PTB    | LBW    | SGA    |
|--|----------|--------|--------|--------|
|  | N=76 870 | N=3620 | N=2107 | N=6257 |
|  | %        | %      | %      | %      |

|    |                         |      |      |      |      |
|----|-------------------------|------|------|------|------|
| 1  |                         |      |      |      |      |
| 2  |                         |      |      |      |      |
| 3  | Age                     |      |      |      |      |
| 4  | <20                     | 1.5  | 2.2  | 2.6  | 1.9  |
| 5  | 20–24                   | 12.2 | 12.7 | 13.8 | 13.2 |
| 6  | 25–29                   | 36.2 | 34.6 | 34.8 | 36.4 |
| 7  | 30–34                   | 35.7 | 33.7 | 33.2 | 34.2 |
| 8  | ≥35                     | 14.4 | 16.7 | 15.6 | 14.3 |
| 9  |                         |      |      |      |      |
| 10 |                         |      |      |      |      |
| 11 | Education               |      |      |      |      |
| 12 | Primary                 | 2.4  | 3.1  | 3.9  | 2.7  |
| 13 | Secondary               | 34.8 | 38.5 | 38.8 | 35.0 |
| 14 | Higher ≤4 years         | 37.8 | 35.6 | 37.3 | 36.1 |
| 15 | Higher >4 years         | 21.3 | 19.2 | 20.5 | 22.2 |
| 16 | Missing                 | 3.7  | 3.6  | 3.7  | 3.9  |
| 17 |                         |      |      |      |      |
| 18 |                         |      |      |      |      |
| 19 | Parity                  |      |      |      |      |
| 20 | Nulliparous             | 54.9 | 61.7 | 68.2 | 70.7 |
| 21 | Multiparous             | 45.1 | 38.3 | 31.8 | 29.3 |
| 22 |                         |      |      |      |      |
| 23 | Smoking                 |      |      |      |      |
| 24 | No                      | 90.9 | 89.3 | 85.8 | 85.6 |
| 25 | Yes                     | 8.5  | 10.1 | 13.6 | 13.6 |
| 26 | Missing                 | 0.7  | 0.6  | 0.6  | 0.7  |
| 27 |                         |      |      |      |      |
| 28 |                         |      |      |      |      |
| 29 | Pre-pregnancy body mass |      |      |      |      |
| 30 | index                   |      |      |      |      |
| 31 | <20                     | 12.4 | 12.8 | 15.6 | 19.1 |
| 32 | 20–24.9                 | 54.9 | 49.9 | 50.8 | 55.6 |
| 33 | 25–29.9                 | 21.0 | 22.0 | 19.0 | 15.2 |
| 34 | ≥30                     | 9.2  | 12.6 | 11.8 | 7.6  |
| 35 | Missing                 | 2.5  | 2.7  | 2.9  | 2.4  |
| 36 |                         |      |      |      |      |
| 37 |                         |      |      |      |      |
| 38 | Mental distress         |      |      |      |      |
| 39 | No                      | 93.3 | 92.3 | 91.3 | 92.3 |
| 40 | Yes                     | 6.8  | 7.7  | 8.7  | 7.7  |
| 41 |                         |      |      |      |      |
| 42 | Adult physical violence |      |      |      |      |
| 43 | No                      | 85.5 | 83.9 | 83.6 | 84.7 |
| 44 | Yes                     | 14.5 | 16.1 | 16.4 | 15.3 |
| 45 |                         |      |      |      |      |
| 46 | Child physical violence |      |      |      |      |
| 47 | No                      | 94.5 | 94.4 | 94.1 | 94.3 |
| 48 | Yes                     | 5.5  | 5.6  | 5.9  | 5.5  |
| 49 |                         |      |      |      |      |
| 50 | Adult emotional abuse   |      |      |      |      |
| 51 | No                      | 83.6 | 82.1 | 81.3 | 82.5 |
| 52 | Yes                     | 16.4 | 17.9 | 18.7 | 17.5 |
| 53 |                         |      |      |      |      |
| 54 | Child emotional abuse   |      |      |      |      |
| 55 | No                      | 86.2 | 85.1 | 84.7 | 85.5 |
| 56 |                         |      |      |      |      |
| 57 |                         |      |      |      |      |
| 58 |                         |      |      |      |      |
| 59 |                         |      |      |      |      |
| 60 |                         |      |      |      |      |

|     |      |      |      |      |
|-----|------|------|------|------|
| Yes | 13.8 | 14.9 | 15.3 | 14.5 |
|-----|------|------|------|------|

The prevalence of adverse neonatal outcomes was generally highest in the youngest (<20 y) and the oldest age groups ( $\geq 35$  y) among smokers and women with primary school education. A BMI  $\geq 30$  was associated with PTB and LBW and BMI <20 with SGA. Women who reported mental distress also reported more PTB, LBW and SGA.

Among the 76 870 women enrolled, 9263 (12.1%) reported a history of mild sexual violence, 2102 (2.8%) moderate and 2746 (3.5%) severe. Women with a history of sexual violence were significantly younger and they were more likely to have primary school education. Additionally, these women more frequently reported smoking, a BMI  $\geq 30$  and mental distress. These women more often experienced other types of violence both as children and adults (data not provided in tables).

A lower gestational age at birth was observed for newborns from women who reported moderate and severe sexual violence with approximately two days when birth was provider-initiated (Table 2).

Table 2. Differences in gestational age for spontaneous and provider-initiated start of birth and birth weight for non-exposed women and women exposed to mild, moderate and severe sexual violence

|                                 | N= 76 870<br>(%) | Mean       | Crude estimate<br>$\beta$ (95% CI) | Adjusted estimate<br>$\beta$ (95% CI)* |
|---------------------------------|------------------|------------|------------------------------------|----------------------------------------|
| <b>Gestational age</b>          |                  |            |                                    |                                        |
| No sexual violence              | 62 699 (81.6)    | 279.7 days | 1                                  | 1                                      |
| <i>Mild sexual violence</i>     |                  |            |                                    |                                        |
| Spontaneous start               | 7323 (11.5)      | 279.9 days | 0.09 (-0.16; 0.33)                 | 0.22 (-0.04; -0.48)                    |
| Provider-initiated start        | 1940 (12.5)      | 280.3 days | 0.36 (-0.37; 1.08)                 | 0.64 (-0.11; 1.39)                     |
| <i>Moderate sexual violence</i> |                  |            |                                    |                                        |
| Spontaneous start               | 1670 (2.7)       | 279.3 days | -0.40 (-0.87; 0.06)                | -0.28 (-0.78; 0.21)                    |
| Provider-initiated start        | 492 (3.2)        | 277.6 days | -2.13 (-3.41; -0.84)               | -2.02 (-3.39; -0.67)                   |
| <i>Severe sexual violence</i>   |                  |            |                                    |                                        |
| Spontaneous start               | 2048 (3.3)       | 278.7 days | -0.91 (-1.37; -0.44)               | -0.65 (-1.15; -0.16)                   |

|                          |               |            |                         |                         |
|--------------------------|---------------|------------|-------------------------|-------------------------|
| Provider-initiated start | 698 (4.5)     | 277.5 days | -2.24 (-3.47; -1.01)    | -1.92 (-3.22; -0.62)    |
| <b>Birth weight</b>      |               |            |                         |                         |
| No sexual violence       | 62 699 (81.6) | 3594 g     | 1                       | 1                       |
| Mild sexual violence     | 9263 (12.1)   | 3597 g     | 2.03 (-9.26; 13.32)     | 0.04 (-9.16; 9.23)**    |
| Moderate sexual violence | 2162 (2.8)    | 3582 g     | -13.61 (-34.74; 7.51)   | 6.11 (-11.30; 23.52)**  |
| Severe sexual violence   | 2746 (3.6)    | 3556 g     | -38.33 (-59.17; -17.49) | -0.76 (-18.05; 16.53)** |

\*Adjusted for maternal age, parity, education, smoking, body mass index and mental distress

\*\*Additional adjustment for gestational age

Among women with a spontaneous start of birth, the gestational age was approximately one half of a day shorter when women reported severe sexual violence. These findings were significant in an adjusted analysis. A crude analysis showed that women who reported a history of severe violence delivered on average 38.3 g lighter children, a difference that disappeared when controlling for gestational age, mother's age, parity, education, smoking, BMI and mental distress. There were no differences regarding birth weight between women with a history of mild or moderate sexual violence compared with non-abused women.

Results from the logistic regression analysis are presented in Table 3.

Table 3. Odds of preterm birth (PTB), low birth weight (LBW) and small for gestational age (SGA) with 95% confidence intervals (CI) according to the different levels of sexual violence

|                          | N (%)         | Prevalence (%)    | Crude odds ratio (95% CI) | Adjusted odds ratio (95% CI)* |
|--------------------------|---------------|-------------------|---------------------------|-------------------------------|
| <b>PTB</b>               |               | <b>3620 (4.7)</b> |                           |                               |
| No sexual violence       | 62 699 (81.6) | 2931 (4.7)        | 1                         | 1                             |
| Mild sexual violence     | 9263 (12.1)   | 412 (4.4)         | 0.95 (0.85-1.06)          | 0.93 (0.83-1.03)              |
| Moderate sexual violence | 2162 (2.8)    | 115 (5.3)         | 1.15 (0.95-1.39)          | 1.14 (0.93-1.39)              |
| Severe sexual violence   | 2746 (3.6)    | 162 (5.9)         | 1.28 (1.08-1.51)          | 1.15 (0.97-1.37)              |
| <b>LBW</b>               |               | <b>2107 (2.7)</b> |                           |                               |
| No sexual violence       | 62 699 (81.6) | 1681 (2.7)        | 1                         | 1                             |
| Mild sexual violence     | 9263 (12.1)   | 257 (2.8)         | 1.04 (0.91-1.18)          | 0.98 (0.85-1.12)              |
| Moderate sexual violence | 2162 (2.8)    | 75 (3.5)          | 1.30 (1.03-1.65)          | 1.19 (0.93-1.53)              |
| Severe sexual violence   | 2746 (3.6)    | 94 (3.4)          | 1.29 (1.04-1.59)          | 1.07 (0.85-1.34)              |
| <b>SGA</b>               |               | <b>6257 (8.1)</b> |                           |                               |
| No sexual violence       | 62 699 (81.6) | 5061 (8.1)        | 1                         | 1                             |
| Mild sexual violence     | 9263 (12.1)   | 768 (8.3)         | 1.03 (0.95-1.12)          | 1.00 (0.91-1.08)              |
| Moderate sexual violence | 2162 (2.8)    | 178 (8.3)         | 1.02 (0.87-1.19)          | 0.95 (0.80-1.12)              |



|                        |            |           |                  |                  |
|------------------------|------------|-----------|------------------|------------------|
| Severe sexual violence | 2746 (3.6) | 250 (9.1) | 1.14 (1.00-1.30) | 1.05 (0.91-1.21) |
|------------------------|------------|-----------|------------------|------------------|

\*Adjusted for maternal age, parity, education, smoking, body mass index and mental distress

Women who reported severe sexual violence had higher odds of PTB, LBW and SGA in a crude analysis, an association that was attenuated and no longer significant when adjusted for maternal age, parity, education, smoking, BMI and mental distress. Other types of violence, both as a child and adult, had small attenuating effects on the odds ratios and were not included in the final models.

The sensitivity analysis, in which we examined the association between a history of sexual violence and SGA and LBW in a sub-sample of women who had a spontaneous term birth, showed the same pattern as in the total sample reported in Table 3. Women who reported severe sexual violence had higher odds of LBW and SGA in a crude analysis but not in the adjusted analysis (Data not provided in tables).

A crude analysis was used to examine if the timing of the violence was associated with adverse outcome. Women who reported recent sexual violence had a higher risk for LBW (OR 1.60 95% CI 1.04-2.17) compared with non-abused women. The association was no longer significant in the adjusted analysis. In our study, 684 (0.9%) women reported recent sexual violence (mild, moderate and severe) and 13 487 (17.5%) previous sexual violence (Supplementary Table S2). There was no association between recent severe sexual violence (rape) and adverse neonatal outcome (Supplementary Table S3). There were 66 (0.1%) women who reported recent rape in this study.

## DISCUSSION

### Main outcome

We found that moderate and severe sexual violence were associated with a reduction in gestational age at birth. The largest effect was observed when birth was provider-initiated among women exposed to moderate or severe violence. These women had an approximately two-day reduction in gestational age. There was no significant association between sexual violence and PTB, LBW or SGA in the adjusted analysis.

### Strength

This study, based on information from a large population-based study, the Norwegian Mother and Child Cohort study (MoBa), which is linked to the Medical Birth Registry (MBRN), gave a unique opportunity to assess the association between sexual violence and outcome for newborns. The validity of the data in MoBa has in earlier research been described as sufficient for large-scale epidemiologic studies.[29, 30] Our study was strengthened by the fact that the information on the different outcome variables was collected prospectively from the quality-assessed MBRN.[31] The outcomes in this study are part of a complex phenomenon that has several different risk factors.[2] The setting in this study, with small social and health inequalities, may therefore be suitable to isolate the effect of sexual violence on adverse neonatal outcomes.

### Limitations

There are also limitations to our study. The participation rate of 40.6% in MoBa is low, and MoBa suffers to some extent from selection bias. The women included in the study are older, have more education, smoke less and are less likely to be of a non-Norwegian origin than the Norwegian population. Although it is likely that there is a socioeconomic gradient that

1  
2  
3 influence prevalence estimates, a recent study by Nilsen et al. found no evidence that the  
4 exposure-outcome associations in the MoBa study were affected by selection bias.[32] This  
5 socioeconomic gradient may also limit the generalisability of our findings. The lack of a  
6 validated instrument for measuring the exposure is a limitation to this study, and violence  
7 measured in modules as part of a larger questionnaire, as that in MoBa, may achieve a lower  
8 disclosure rate.[5] However, a similar prevalence to that found in our study was reported in a  
9 Nordic study examining sexual violence and health.[33] The exposure was measured in  
10 gestational week 17, and sexual violence during pregnancy after this is therefore not included.  
11  
12 In addition, we have no information on the context and frequency of the violence or  
13 information regarding the perpetrator.  
14  
15  
16  
17  
18  
19  
20  
21  
22  
23  
24  
25  
26

27 To our knowledge, no studies have examined the influence of lifetime sexual violence  
28 reported during pregnancy on the gestational age at birth for newborns. There were minor  
29 differences in the gestational age between abused and non-abused women in this study, and  
30 the clinical importance of our findings for the health of the newborn is most likely limited.  
31  
32 However, the difference between the provider-initiated and spontaneous initiation of birth  
33 may be of interest. Shorter provider-initiated pregnancies may suggest an increase in elective  
34 inductions and elective caesarean sections for those exposed to violence. This is supported by  
35 others [34, 35] and in our previous study on sexual violence and maternal outcome.[36]  
36  
37 Studies have emphasised the meaning of control for abused women when giving birth,[37]  
38 and choosing a planned start of birth may help the abused women remain in control.  
39  
40  
41  
42  
43  
44  
45  
46  
47  
48  
49  
50

51 Unlike the current meta-analysis (not yet published), mentioned in a WHO report [5] we did  
52 not find sexual violence to be associated with PTB and LBW in adjusted analysis. To our  
53 knowledge, no study has found an association between violence and SGA. The studies  
54  
55  
56  
57  
58  
59  
60

1  
2  
3 included in the meta-analysis were limited to sexual and/or physical intimate partner violence.  
4  
5 However, our findings are supported by a Canadian population based study with a sample of 6  
6  
7 421 pregnant women [17] and a prospective cohort study including 1 555 women from the  
8  
9 US.[15] The exposure in these studies was physical and sexual violence prior to pregnancy  
10  
11 and in pregnancy without being limited to an intimate partner.[15, 17] These studies showed  
12  
13 no association between violence and PTB or LBW.  
14  
15

16  
17  
18 The nature of the exposure measured in the MoBa study makes it difficult to directly compare  
19  
20 our findings to others, mainly because we examined lifetime sexual violence by any  
21  
22 perpetrator, not limited to intimate partner. Sexual violence is considered to be traumatic for  
23  
24 the victim regardless if the perpetrator is a partner or not.[38] When an intimate partner is the  
25  
26 perpetrator, sexual violence may in addition be accompanied by controlling behaviour and  
27  
28 include both physical and emotional abuse.[38] Rape by strangers is usually a single violent  
29  
30 event with a higher risk of physical injury. Both forms of violence are associated with adverse  
31  
32 health effects,[5, 38] but the effect may differ. Unfortunately, we were not able to examine the  
33  
34 effect of the perpetrator in this study because the MoBa study does not provide this  
35  
36 information. However, research suggests that a substantial proportion of sexual violence  
37  
38 occurs within an intimate relationship.[38] It is not unlikely that the question about severe  
39  
40 sexual violence (rape) primarily reflects non-partner sexual abuse and that mild sexual  
41  
42 violence (pressured to sexual acts) may be a more psychological exposure. Our crude analyses  
43  
44 showed different results, with a significantly higher OR for adverse neonatal outcome among  
45  
46 women who reported severe sexual violence, thus supporting the idea that the different levels  
47  
48 of violence are different exposures. The use of a more comprehensive instrument when  
49  
50 measuring the exposure, with multiple response options regarding context, frequency and  
51  
52 perpetrator would have clarified this further and provided more comprehensive knowledge  
53  
54  
55  
56  
57  
58  
59  
60

1  
2  
3 about the nature of the violence. Nevertheless, we had the opportunity to control for both  
4  
5 emotional and physical abuse in preliminary analysis and this did not change the ORs.  
6  
7

8  
9  
10 The prevalence of abuse during pregnancy is small in our study and may have decreased the  
11  
12 power to detect an association between violence during pregnancy and adverse neonatal  
13  
14 outcomes, an association that is supported by other studies.[10, 14, 39, 40] Living in an  
15  
16 abusive relationship may have stopped women from disclosing the violence. In our study,  
17  
18 sexual violence was assessed approximately in gestational week 17, and events of violence  
19  
20 after that have been missed. Some studies suggest that the risk of sexual violence may  
21  
22 increase with the length of the pregnancy for women that are exposed.[41] The studies that  
23  
24 report the highest prevalence of violence have measured this several times during  
25  
26 pregnancy.[6] Studies have reported a violence prevalence during pregnancy of between 3 to  
27  
28 19%.[6, 42], including both physical and sexual violence. Underreporting among the non-  
29  
30 exposed may have caused a misclassification that has diminished the associations between  
31  
32 sexual violence and neonatal outcomes in our study. Since the exposure was collected before  
33  
34 the outcome, it is unlikely that misclassification was related to the outcome, thus resulting in a  
35  
36 nondifferential misclassification that has biased the result towards the null. However, our  
37  
38 prevalence of recent sexual (0.9%) violence is similar to the prevalence of 1% reported in a  
39  
40 survey that assessed intimate partner violence among a representative sample of Norwegian  
41  
42 women.[43] This number reflects the prevalence of sexual violence reported during the last  
43  
44  
45  
46  
47 year.  
48

49  
50  
51 Several pathways between sexual violence and adverse neonatal outcomes are suggested, both  
52  
53 direct and indirect.[5] The direct pathway of violence during pregnancy can cause immediate  
54  
55 complications as bleeding, rupture of membranes and PTB, and examples of indirect  
56  
57  
58  
59  
60

1  
2  
3 pathways include more health-risk behaviours, depression and stress/anxiety.[5, 44] Both  
4  
5 experienced violence and living in an abusive environment can cause increased stress levels,  
6  
7 which could be on the pathway between abuse and adverse neonatal outcome. Maternal  
8  
9 exposure to stress can influence the hypothalamic pituitary axis (HPA) hormones, and it is  
10  
11 suggested that changes in these hormones may cause negative outcomes, such as a reduction  
12  
13 in gestational age and fetal growth restriction.[4, 45] It has been proposed that mental distress  
14  
15 and symptoms of depression are on the causal pathway between violence and adverse health  
16  
17 outcome, yet it has also been suggested that women with mental health difficulties are more  
18  
19 likely to be victims of violence.[46] Because the relationship may be bi-directional, we chose  
20  
21 to control for mental distress in our study. Similarly, the health risk behaviours smoking and  
22  
23 BMI may be on the pathway between sexual violence and neonatal outcome. Nevertheless, we  
24  
25 kept these covariates in the regression analysis because they are especially related to birth  
26  
27 weight and PTB.[3, 47]  
28  
29  
30  
31  
32  
33

### 34 **Conclusion**

35  
36 Overall, our findings provide no evidence for an association between lifetime sexual violence  
37  
38 and adverse neonatal outcomes. A small significant effect on the gestational age at birth was  
39  
40 detected, but the clinical importance of this is most likely limited for the health of the  
41  
42 newborn. PTB, LBW and SGA all have complex origins with multiple possible pathways.[1,  
43  
44 2] Although we did not find an association between sexual violence and PTB, LBW or SGA  
45  
46 in adjusted analyses, crude analyses in our study suggested that sexual violence may be a risk  
47  
48 factor for adverse neonatal outcomes for some women; however, for the majority of women,  
49  
50 the relationship was confounded by other risk factors. It is possible that these factors were the  
51  
52 result of prior exposure to violence, but this could not be assessed in this study. Antenatal care  
53  
54 is one of the most important entry points in which women seek health care without necessarily  
55  
56  
57  
58  
59  
60

1  
2  
3 disclosing ongoing exposure to violence or a history of sexual violence. It is recommended  
4  
5 that caregivers and clinicians ask women about exposure to violence when assessing  
6  
7 conditions that may be complicated by violence,[48] and more knowledge about this  
8  
9 conditions is needed. Additionally, antenatal care may offer opportunities for women to  
10  
11 receive help, both if they are exposed to violence and in providing assistance to change  
12  
13 behavioural factors contributing to adverse outcomes.  
14  
15  
16  
17  
18  
19  
20  
21  
22  
23  
24  
25  
26  
27  
28  
29  
30  
31  
32  
33  
34  
35  
36  
37  
38  
39  
40  
41  
42  
43  
44  
45  
46  
47  
48  
49  
50  
51  
52  
53  
54  
55  
56  
57  
58  
59  
60

### **Acknowledgement**

We are grateful to all the participating families in Norway who take part in this ongoing cohort study.

### **Contributions to authorship**

LH participated in the conception and design of the study, performed the analysis and drafted the manuscript. BS participated in the conception of the study, advised on the statistical analyses and drafting of the manuscript. SV advised on the statistical analyses and the drafting of the manuscript. ML participated in the conception and design of the study, advised on the statistical analyses and participated in drafting the manuscript. All authors read and approved the final version.

### **Funding**

The Norwegian Mother and Child Cohort Study is supported by the Norwegian Ministry of Health and the Ministry of Education and Research, NIH/NIEHS (contract no N01-ES-75558), NIH/NINDS (grant no.1 U01 NS 047537-01 and grant no.2 U01 NS 047537-06A1), and the Norwegian Research Council/FUGE (grant no. 151918/S10). The first author of this article is supported by South-Eastern Norway Regional Health Authority (grant no. 2012010) and the second author is supported by the The Research Council of Norway (grant no. 204292/H10).

### **Data Sharing Statement**

No additional data are available.

### **Competing interests**

None.



## Reference List

- (1) Green NS, Damus K, Simpson JL, et al. Research agenda for preterm birth: recommendations from the March of Dimes. *Am J Obstet Gynecol* 2005;193:626-35.
- (2) March of Dimes, PMNCH, Save The Children, WHO. Born Too Soon: The Global Action Report on Preterm Birth. Geneva: World Health Organization 2012
- (3) Wilcox AJ. On the importance-and the unimportance-of birth weight. *Int J Epidemiol* 2001;30:1233-41.
- (4) Lazinski MJ, Shea AK, Steiner M. Effects of maternal prenatal stress on offspring development: a commentary. *Arch Womens Ment Health* 2008;11:363-75.
- (5) Garcia-Moreno C, Pallitto C, Devries K, et al. Global and regional estimates of violence against women: prevalence and health effects of intimate partner violence and non-partner sexual violence. Geneva: World Health Organization; 2013.
- (6) Campbell J, Garcia-Moreno C, Sharps P. Abuse During Pregnancy in Industrialized and Developing Countries. *Violence Against Women* 2004;10:770-89.
- (7) Garcia-Moreno C, Jansen HA, Ellsberg M, et al. Prevalence of intimate partner violence: findings from the WHO multi-country study on women's health and domestic violence. *Lancet* 2006;368:1260-9.
- (8) Sanchez SE, Alva AV, Diez CG, et al. Risk of spontaneous preterm birth in relation to maternal exposure to intimate partner violence during pregnancy in Peru. *Matern Child Health J* 2013;17:485-92.
- (9) Leeners B, Stiller R, Block E, et al. Pregnancy complications in women with childhood sexual abuse experiences. *J Psychosom Res* 2010;69:503-10.
- (10) Nunes MA, Camey S, Ferri CP, et al. Violence during pregnancy and newborn outcomes: a cohort study in a disadvantaged population in Brazil. *Eur J Public Health* 2011;21(1):92-7.
- (11) Rodrigues T, Rocha L, Barros H. Physical abuse during pregnancy and preterm delivery. *Am J Obstet Gynecol* 2008;198:171-6.
- (12) Noll JG, Schulkin J, Trickett PK, et al. Differential pathways to preterm delivery for sexually abused and comparison women. *J Pediatr Psychol* 2007;32:1238-48.
- (13) Silverman JG, Decker MR, Reed E, et al. A. Intimate partner violence victimization prior to and during pregnancy among women residing in 26 U.S. states: associations with maternal and neonatal health. *Am J Obstet Gynecol* 2006;195:140-8.
- (14) Murphy CC, Schei B, Myhr TL, et al. Abuse: a risk factor for low birth weight? A systematic review and meta-analysis. *CMAJ* 2001;164:1567-72.
- (15) Fried LE, Cabral H, Amaro H, et al. Lifetime and during pregnancy experience of violence and the risk of low birth weight and preterm birth. *J Midwifery Womens Health* 2008 ;53:522-8.

- 1  
2  
3 (16) Janssen PA, Holt VL, Sugg NK, et al. Intimate partner violence and adverse  
4 pregnancy outcomes: a population-based study. *Am J Obstet Gynecol* 2003;188:1341-  
5 7.
- 6  
7 (17) Urquia ML, O'Campo PJ, Heaman MI, et al. Experiences of violence before and  
8 during pregnancy and adverse pregnancy outcomes: an analysis of the Canadian  
9 Maternity Experiences Survey. *BMC Pregnancy Childbirth* 2011;11:42.
- 10  
11 (18) Altarac M, Strobino D. Abuse during pregnancy and stress because of abuse during  
12 pregnancy and birthweight. *J Am Med Womens Assoc* 2002;57:208-14.
- 13  
14 (19) Cokkinides VE, Coker AL, Sanderson M, et al. Physical violence during pregnancy:  
15 maternal complications and birth outcomes. *Obstet Gynecol* 1999;93:661-6.
- 16  
17 (20) Grimstad H, Schei B, Backe B, et al. Physical abuse and low birthweight: a case-  
18 control study. *Br J Obstet Gynaecol* 1997;104:1281-7.
- 19  
20 (21) Kaye DK, Mirembe FM, Bantebya G, et al. Domestic violence during pregnancy and  
21 risk of low birthweight and maternal complications: a prospective cohort study at  
22 Mulago Hospital, Uganda. *Trop Med Int Health* 2006;11:1576-84.
- 23  
24 (22) Magnus P, Irgens LM, Haug K, et al. Cohort profile: the Norwegian Mother and Child  
25 Cohort Study (MoBa). *Int J Epidemiol* 2006;35:1146-50.
- 26  
27 (23) Lukasse M, Henriksen L, Vangen S, et al. Sexual violence and pregnancy-related  
28 physical symptoms. *BMC Pregnancy Childbirth* 2012;12:83.
- 29  
30 (24) Henriksen L, Vangen S, Schei B, et al. Sexual violence and antenatal hospitalization.  
31 *Birth* 2013;40:281-8.
- 32  
33 (25) Skjaerven R, Gjessing HK, Bakketeig LS. et al. Birthweight by gestational age in  
34 Norway. *Acta Obstet Gynecol Scand* 2000;79:440-9.
- 35  
36 (26) Strand BH, Dalgard OS, Tambs K, et al. Measuring the mental health status of the  
37 Norwegian population: a comparison of the instruments SCL-25, SCL-10, SCL-5 and  
38 MHI-5 (SF-36). *Nord J Psychiatry* 2003;57:113-8.
- 39  
40 (27) Field A. Discovering statistics using SPSS. Los Angeles: SAGE; 2009.
- 41  
42 (28) Veierød MB, Lydersen S, Laake P, et at. Medical statistics: in clinical and  
43 epidemiological research. Oslo: Gyldendal akademisk; 2012.
- 44  
45 (29) Kvalvik LG, Nilsen RM, Skjaerven R, et al. Self-reported smoking status and plasma  
46 cotinine concentrations among pregnant women in the Norwegian Mother and Child  
47 Cohort Study. *Pediatr Res* 2012 ;72:101-7.
- 48  
49 (30) Furu K, Karlstad O, Skurtveit S, et al. High validity of mother-reported use of  
50 antiasthmatics among children: a comparison with a population-based prescription  
51 database. *J Clin Epidemiol* 2011;64:878-84.
- 52  
53 (31) Irgens LM. The Medical Birth Registry of Norway. Epidemiological research and  
54 surveillance throughout 30 years. *Acta Obstet Gynecol Scand* 2000;7:435-9.
- 55  
56  
57  
58  
59  
60

- 1  
2  
3 (32) Nilsen RM, Vollset SE, Gjessing HK, et al. Self-selection and bias in a large  
4 prospective pregnancy cohort in Norway. *Paediatr Perinat Epidemiol* 2009 23:597-  
5 608.  
6  
7 (33) Hilden M, Schei B, Swahnberg K, et al. A history of sexual abuse and health: a Nordic  
8 multicentre study. *BJOG* 2004;111:1121-7.  
9  
10 (34) Nerum H, Halvorsen L, Straume B, et al. Different labour outcomes in primiparous  
11 women that have been subjected to childhood sexual abuse or rape in adulthood: a  
12 case-control study in a clinical cohort. *BJOG* 2013;120:487-495.  
13  
14 (35) Lukasse M, Vangen S, Oian P, et al. Childhood abuse and caesarean section among  
15 primiparous women in the Norwegian Mother and Child Cohort Study. *BJOG*  
16 2010;117:1153-7.  
17  
18 (36) Henriksen L, Schei B, Vangen S, et al. Sexual violence and mode of delivery: a  
19 population-based cohort study. *BJOG* 2014;12:1237-1244  
20  
21 (37) Montgomery E. Feeling Safe: A Metasynthesis of the Maternity Care Needs of  
22 Women Who Were Sexually Abused in Childhood. *Birth* 2013;40:88-95.  
23  
24 (38) Abrahams N, Devries K, Watts C, et al. Worldwide prevalence of non-partner sexual  
25 violence: a systematic review. *Lancet*. 2014;383(9929):1648-54. Epub 2014/02/18.  
26  
27  
28  
29 (39) Faramarzi M, Esmaelzadeh S, Mosavi S. Prevalence, maternal complications and birth  
30 outcome of physical, sexual and emotional domestic violence during pregnancy. *Acta*  
31 *Med Iran* 2005;43:115-22.  
32  
33 (40) Valladares E, Ellsberg M, Pena R, et al. Physical partner abuse during pregnancy: a  
34 risk factor for low birth weight in Nicaragua. *Obstet Gynecol* 2002;100:700-5.  
35  
36 (41) Shah PS, Shah J. Maternal exposure to domestic violence and pregnancy and birth  
37 outcomes: a systematic review and meta-analyses. *J Womens Health (Larchmt)*.  
38 2010;19:2017-31.  
39  
40 (42) Sharps PW, Laughon K, Giangrande SK. Intimate partner violence and the  
41 childbearing year: maternal and infant health consequences. *Trauma Violence Abuse*  
42 2007;8:105-16.  
43  
44 (43) Neroien AI, Schei B. Partner violence and health: results from the first national study  
45 on violence against women in Norway. *Scand J Public Health* 2008;36:161-8.  
46  
47 (44) Leeners B, Neumaier-Wagner P, Quarg AF, et al. Childhood sexual abuse (CSA)  
48 experiences: an underestimated factor in perinatal care. *Acta Obstet Gynecol Scand*  
49 2006;85:971-6.  
50  
51 (45) Valladares E, Pena R, Ellsberg M, et al. Neuroendocrine response to violence during  
52 pregnancy-impact on duration of pregnancy and fetal growth. *Acta Obstet Gynecol*  
53 *Scand* 2009;88:818-23.  
54  
55  
56  
57  
58  
59  
60

- 1  
2  
3 (46) Devries KM, Mak JY, Bacchus LJ, et al. Intimate partner violence and incident  
4 depressive symptoms and suicide attempts: a systematic review of longitudinal  
5 studies. *PLoS Med* 2013;10:e1001439  
6  
7 (47) McDonald SD, Han Z, Mulla S, Beyene J. Overweight and obesity in mothers and risk  
8 of preterm birth and low birth weight infants: systematic review and meta-analyses.  
9 *BMJ* 2010;341:3428.  
10  
11 (48) World health organisation. Responding to intimate partner violence and sexual  
12 violence against women: *WHO clinical and policy guidelines*. Geneva: WHO; 2013.  
13  
14  
15  
16  
17  
18  
19  
20  
21  
22  
23  
24  
25  
26  
27  
28  
29  
30  
31  
32  
33  
34  
35  
36  
37  
38  
39  
40  
41  
42  
43  
44  
45  
46  
47  
48  
49  
50  
51  
52  
53  
54  
55  
56  
57  
58  
59  
60

**TITLE PAGE**

Title: Sexual violence and neonatal outcomes: a [Norwegian](#) population-based cohort study

Lena Henriksen<sup>1</sup>, Berit Schei<sup>2,3</sup>, Siri Vangen<sup>4</sup>, Mirjam Lukasse<sup>5</sup>

Corresponding author: Lena Henriksen<sup>1</sup>, Section of Obstetrics, Department for Women's and Children's Health, Oslo University Hospital, Postboks 4950 Nydalen, N-0424 Oslo, Norway.

E-mail: [uxhelz@ous-hf.no](mailto:uxhelz@ous-hf.no) Phone: +47 90068485.

Co-authors: Berit Schei<sup>2</sup>, Department of Public Health and General Practice, Faculty of Medicine, The Norwegian University of Science and Technology (NTNU), Håkon Jarls gate 11, N-7489 Trondheim, Norway. <sup>3</sup>Department of Obstetrics and Gynecology, St.Olavs Hospital, Trondheim University Hospital, Postbox 3250 Sluppen, N-7006 Trondheim, Norway.

Siri Vangen<sup>4</sup>, National Resource Centre for Women's Health, Department for Women's and Children's Health, Oslo University Hospital, Postboks 4950 Nydalen, N-0424 Oslo, Norway.

Mirjam Lukasse<sup>5</sup>, Department of Health, Nutrition and Management, Faculty of Health Sciences, Oslo and Akershus University College of Applied Sciences, Postboks 4 St. Olavs plass, N-0130 Oslo, Norway.

Keywords: Sexual violence, rape, premature birth, low birth weight, small for gestational age, MoBa.

Word count: [42493644](#)

## ABSTRACT

Objective: The objective of this study was to explore the association between sexual violence and neonatal outcomes.

Design: National cohort study.

Setting: Women were recruited to the Norwegian Mother and Child Cohort Study (MoBa) when attending routine ultrasound examinations from 1999-2008.

Population: A total of 76 870 pregnant women.

Methods: Sexual violence and maternal characteristics were self-reported in postal questionnaires during pregnancy. Neonatal outcomes were retrieved from the Medical Birth Registry of Norway (MBRN). Risk estimations were performed with linear and logistic regression analysis.

Outcome measures: Gestational age at birth, birth weight, preterm birth (PTB), low birth weight (LBW) and small for gestational age (SGA).

Results: Of 76 870 women, 18.4% reported a history of sexual violence. A total of 4.7% had a premature birth, 2.7% had children with a birth weight <2500 g and 8.1% children were small for gestational age. Women reporting both moderate and severe sexual violence (rape) had a significantly reduced gestational length (2 days) when the birth was provider-initiated in an analysis adjusted for age, parity, education, smoking, BMI and mental distress. Those exposed to severe sexual violence had a significantly reduced gestational length of 0.51 days with a spontaneous start of birth. Crude estimates showed that severe sexual violence was associated with PTB, LBW and SGA. When controlling for the above-mentioned socio-demographic and behavioural factors, the association was no longer significant.

Conclusions: Sexual violence was not associated with adverse neonatal outcomes. Moderate and severe violence had a small but significant effect on gestational age; however, the clinical influence of this finding is most likely limited. Women exposed to sexual violence in this study reported more of the socio-demographic and behavioural factors associated with PTB, LBW and SGA compared with non-abused women.

## STRENGTHS AND LIMITATIONS OF THIS STUDY

- This study was based on information from a large population-based study described as sufficient for large-scale epidemiologic studies.
- All outcomes were collected prospectively from a quality-assessed birth register.
- The setting, with small social and health inequalities, was suitable to isolate the effect of sexual violence on adverse neonatal outcomes.
- A non-validated instrument for measuring of the exposure variable was a limitation to this study.

## INTRODUCTION

Preterm birth is a common and costly health problem.[1, 2] Approximately one in ten babies are born preterm worldwide, and prematurity is considered to be the leading cause of death for newborns.[2] Low birth weight (LBW) can be a consequence of preterm birth (PTB) or intra uterine growth restriction, the latter leading to the birth of small for gestational age (SGA) infants.[3] Research has ~~suggested identified~~ some biological risk factors for PTB and LBW: ~~ethnicity~~, multiple pregnancies, a previous preterm birth and uterine or placental abnormalities.[1, 3] Studies also emphasise ~~other, less understood behavioural and social factors as important but less understood~~ factors for both PTB and LBW.[1] These ~~are factors can be~~ maternal age, socio-economic status, ~~ethnicity~~, maternal weight, substance abuse, stress, depression and violence.[1, 2, 4]

Violence against women is a significant public health problem, and a recent report from the World Health Organization (WHO) state that 35% of women worldwide have experienced either physical and/or sexual intimate partner violence or non-partner sexual violence.[5] A pregnancy does not protect women from violence, and the prevalence of physical or sexual violence during pregnancy ranges from 3.4-11% in high-income countries.[6] It is recognised that violence has an adverse impact on women's physical, sexual, reproductive, and mental health.[5, 7]

A connection between PTB or LBW and violence against women has been reported, but the association is both supported and contradicted.[5, 8-20] ~~Several pathways between sexual violence and adverse pregnancy outcomes are suggested.~~ [5] ~~A direct pathway of sexual violence can result in immediate complications as bleeding and rupture of membranes that can~~

1  
2  
3 lead to a preterm birth.[5, 16] Other, more indirect pathways are suggested mediated by stress  
4 and stress responses [18] or by behavioural factors such as smoking or substance abuse, used  
5 to cope with the negative consequences of violence.[5]  
6  
7  
8  
9

10  
11 Studies have primarily addressed physical abuse during pregnancy and PTB or LBW [8, 10,  
12 11, 16-19, 21] or child sexual abuse and PTB/LBW.[9, 12] Results from a new meta-analysis  
13 published in the recent WHO report [5] have demonstrated an association between intimate  
14 partner violence, including both physical and sexual abuse, and PTB with an adjusted odds  
15 ratio (AOR) of 1.41 (95% CI 1.21-1.62) and AOR of 1.16 (95% CI: 1.02-1.29) with LBW.[5]  
16  
17

18  
19 However, ~~studies on sexual violence and neonatal outcomes~~ studies that have investigated the  
20 impact of sexual violence on neonatal outcomes specifically, are limited and few population-  
21 based studies with large sample sizes that enable controlling for confounding variables have  
22 been conducted [5, 11] ~~Thus, there is a need to study the potential effect of lifetime sexual~~  
23 ~~violence on outcomes for newborns using a large cohort.~~ The Norwegian Mother and Child  
24 Cohort Study (MoBa) is a population-based prospective cohort study of pregnant women that  
25 includes measurements of lifetime sexual violence, sexual violence during pregnancy and  
26 other relevant covariates which makes it suitable to examine associations between sexual  
27 violence and neonatal outcome. In this study, we assessed the relationship between sexual  
28 violence and gestational age at birth and birth weight. Additionally, we explored the  
29 associations between sexual violence and PTB, LBW and SGA.  
30  
31  
32  
33  
34  
35  
36  
37  
38  
39  
40  
41  
42  
43  
44  
45  
46  
47  
48

## 49 **METHODS**

50  
51 This study was a sub-project in the MoBa -study that was conducted by the Norwegian  
52 Institute of Public health from 1999-2008.[22] All pregnant women in Norway were eligible  
53 to participate in MoBa, and they were recruited during their routine foetal ultrasound  
54  
55  
56  
57  
58  
59  
60



1  
2  
3 examination. Of the invited women, 40.6% consented to participate. Data were obtained  
4  
5 through extensive self-administered questionnaires that contained demographic factors,  
6  
7 general health, reproductive history and questions about maternal health status during  
8  
9 pregnancy. Our analyses were based on questionnaire 1 (Q1), which was completed during  
10  
11 (approximately) gestational week 17, and questionnaire 3 (Q3), which was completed during  
12  
13 (approximately) gestational week 30. Data from MoBa were linked with data from the  
14  
15 Medical Birth Registry of Norway (MBRN), which provided information on pregnancy and  
16  
17 birth outcome. The current study is based on version VI of the quality-assured data files  
18  
19 released for research in 2011. The MoBa study is described in detail elsewhere.[22] [The](#)  
20  
21 [questionnaires that were used in MoBa are available at the internet-site:](#)  
22  
23 <http://www.fhi.no/studier/den-norske-mor-og-barn-undersokelsen/sporreskjemaer>  
24  
25  
26  
27  
28  
29  
30  
31  
32  
33

### 34 **Study population**

35  
36 This study included women who had a singleton birth between 22 and 44 weeks of gestation,  
37  
38 who completed both Q1 and Q3, had MBRN data available and participated for the first time  
39  
40 (79 363 women). While a pregnancy is the observation unit in the MoBa study, women are  
41  
42 the observation unit in our study; hence, the exclusion of 13 475 pregnancies of women who  
43  
44 participated more than once. We excluded 703 women who did not answer the questions on  
45  
46 sexual violence. Further, we excluded records with missing data on gestational length  
47  
48 (n= 297) and birth weight (n=41). We also excluded 6 children with birth weight <500 g and 4  
49  
50 children with birth weight >6000 g, leaving a study sample of 76 870 women (Figure 1).  
51  
52  
53  
54  
55

### 56 **Ethical statement**

57  
58  
59  
60

1  
2  
3 Informed consent was obtained from each women participating in the study. The Regional  
4  
5 Committee for Medical Research Ethics (Ref.SAFH 95/313 RTL) and the Norwegian Data  
6  
7 Inspectorate approved the study.  
8  
9

## 10 11 12 13 14 **Variables**

### 15 16 Exposure variable

17  
18 The exposure variable was collected from Q1 ~~;~~ ~~here, the w~~Women were asked if they had  
19  
20 been ~~1)~~ pressured or forced to ~~perform~~ sexual relations. There were four possible answer  
21  
22 options: 1) No, never acts, 2) Yes, pressured, 23) Yes, forced with violence or 43) Yes, raped.

23  
24 A positive answer was defined as having experienced sexual violence. Women with more  
25  
26 than one positive answer were classified according to the most severe level reported. The  
27  
28 answering options were coded into three levels of severity for the sexual violence: 1) mild  
29  
30 (pressured), 2) moderate (forced with violence) and 3) severe (raped). ~~and by the timing of~~  
31  
32 the abuse (previously or recent). Recent meant exposed to sexual violence in the current  
33  
34 pregnancy or the last 6 or 12 months before pregnancy. Women could also indicate when the  
35  
36 violence had taken place: 1) during this pregnancy, 2) during the last six month before  
37  
38 pregnancy or 3) earlier. Approximately 1 700 women who filled out the first version of Q1  
39  
40 had the answering options earlier and during the last 12 month when assessing time. We  
41  
42 therefore created the variables previous and recent sexual violence, recent containing sexual  
43  
44 violence during last 12 month, including the current pregnancy. Among the women who  
45  
46 participated several times we included the first pregnancy only to ensure that the exposure  
47  
48 was included only once per woman. More details about the exposure variable can be found in  
49  
50 our previous studies ~~;~~ [23;24] and in supplementary table 1.  
51  
52  
53  
54  
55  
56  
57  
58  
59  
60

### Outcome variables

All outcome variables were obtained from the MBRN. Gestational age at birth in days was based on ultrasound at (approximately) gestational week 18. For women with no ultrasound, the gestational age was based on the last menstrual period (1.7%). PTB was defined as a gestational age <37, LBW as a birth weight <2500 grams, and SGA was defined as birth weight below the 10th percentile for the gestational age at birth. SGA was calculated using Norwegian specific fetal growth tables by Skjerven et al.[25]

### Adjusting variables

Maternal age, parity, socio-economical status, smoking and body mass index (BMI) were considered as possible confounding factors and were adjusted for. All adjusting variables were taken from the MoBa. In Q1, age was categorised into 5 groups: younger than 20 years, 20–24 years, 25–29 years, 30–34 years or 35 years and older. As a proxy for socio-economic status, we used the woman's education in years (categorised into 4 groups): primary (<12 years), secondary (12 years), higher  $\leq 4$  years (13–16 years and) and higher >4 years ( $\geq 17$  years). Parity was dichotomised into nulli- and multiparous women. Smoking was categorised as no smoking or smoking, which included both daily and occasional smoking. BMI was grouped into 4 categories: <20, 20-24.9, 25.0-29.9 or  $\geq 30.0$  kg/m<sup>2</sup>. We also adjusted for mental distress because it is considered to be associated with both the exposure and the outcome.[4,5] Mental distress was measured using 5 items from The Hopkins symptoms checklist (SCL-5) with a cut-off at  $\geq 2.0$  points, as suggested by Strand [26] and obtained from Q3.

1  
2  
3 Because of the co-occurrence of different violence types,[7] we examined the effect of  
4 physical and emotional abuse as a child or as an adult in the multivariable statistical models.  
5  
6 Information on adult physical violence was taken from Q1 and consisted of a positive answer  
7 to whether women as an adult had experienced being slapped, hit, kicked or otherwise  
8 bothered in a physical manner. Child physical violence was taken from Q3 and consisted of a  
9 positive answer to the question “Have you experienced physical violence before the age of  
10 18?” Emotional abuse as a child (<18) or as an adult (≥18) consisted of a positive answer to  
11 either, “Someone has over a long period of time systematically tried to subdue, degrade or  
12 humiliate you” or “Someone has threatened to hurt you or someone close to you” or both.  
13  
14  
15  
16  
17  
18  
19  
20  
21  
22  
23  
24

25 Previous preterm birth and inadequate antenatal care are considered to be associated with the  
26 exposure and the outcomes.[2, 3, 5] Because a previous preterm birth may be a result of  
27 sexual violence prior to the related pregnancy, we did not control for a previous preterm birth.  
28  
29 In Norway, the majority of women attend antenatal care, a free and a well-integrated part of  
30 the public health system; therefore, we did not control for antenatal care. Ethnicity was not  
31 considered a relevant covariate confounding factor in our study because the majority of the  
32 MoBa participants are ethnic Norwegian.  
33  
34  
35  
36  
37  
38  
39  
40  
41  
42

### 43 **Statistical Analysis**

44 Characteristics were presented as percentages within the entire sample and the different  
45 outcomes. Linear regression was performed to assess differences in birth weight and  
46 gestational age for children born to women with and without a history of mild, moderate and  
47 severe sexual violence. The association between sexual violence and PTB, LBW and SGA  
48 was estimated with crude and adjusted odds ratios using logistic regression analysis. Sexual  
49  
50  
51  
52  
53  
54  
55  
56  
57  
58  
59  
60

1  
2  
3 violence was analysed as a categorical variable: 1=mild sexual violence, 2= moderate sexual  
4 violence and 3=severe sexual violence with no sexual violence as the reference group. All  
5  
6  
7 analyses were adjusted for maternal age, parity, education, smoking, BMI and mental distress  
8  
9 in the first step. Birth weight was additionally adjusted for gestational age. We further  
10  
11 adjusted for other types of violence in the second step. We initially tested the correlation  
12  
13 between other types of violence and sexual violence because of co-occurrence, and all  
14  
15 Pearson's correlation coefficients were below the generally accepted cut-off of <0.4 for use as  
16  
17 a covariate in the regression analyses.[27] Post protocol, we stratified the sample into  
18  
19 spontaneous start of birth and provider-initiated start of birth (induced start of birth or elective  
20  
21 caesarean section) for gestational age because a provider-initiated start could influence the  
22  
23 time point of birth. Information on how the birth started was taken from MBRN. We  
24  
25 additionally performed a sensitivity analysis in which we examined the association between  
26  
27 sexual violence and SGA and LBW among women who had a spontaneous birth at term ( $\geq 37$   
28  
29 weeks) because we wanted to examine the effect of violence in a group of women who were  
30  
31 considered to be low risk according to gestational age and start of birth. When we examined  
32  
33 the timing of the sexual violence, we compared women who were exposed to recent (~~sexual~~  
34  
35 violence (within the last ~~violence during pregnancy or the last 6 or~~ 12 months) and those  
36  
37 exposed to previous sexual violence to non-abused women. We also examined the timing  
38  
39 among women reporting recent and previous severe sexual violence (rape) for all outcomes.  
40  
41 The prevalence of missing data was generally low with 2.5% for BMI, 3.7% for education,  
42  
43 and 0.7% for smoking during pregnancy. Because of this, no imputing methods for missing  
44  
45 data were used,[28] except for the missing data for the SCL-5 (3.2%), which were replaced by  
46  
47 the series mean. The results of the logistic regression analyses remained approximately the  
48  
49 same when performed with the complete exclusion of missing data compared with using the  
50  
51 imputed missing data for SCL-5.  
52  
53  
54  
55  
56  
57  
58  
59  
60

The comparison group for all analyses was women not reporting any sexual violence. All analyses were performed with the statistical package SPSS for WINDOWS (SPSS Inc., Chicago, IL, USA) version 18. P-values <0.05 were considered statistically significant.

## RESULTS

The mean gestational age at birth in the total sample was 279.6 days (standard deviation 11.9 days), and the mean birth weight was 3592.7 grams (standard deviation 547.1 g). Table 1 displays the characteristics in the total sample and by the different outcomes.

Table 1. Background characteristics in the total sample and by preterm birth (PTB): gestational age <week 37, low birth weight (LBW): weight <2500 g and small for gestational age (SGA) weight below the 10<sup>th</sup> percentile by gestational age at birth in the Mother and Child Cohort

|                 | Total    | PTB    | LBW    | SGA    |
|-----------------|----------|--------|--------|--------|
|                 | N=76 870 | N=3620 | N=2107 | N=6257 |
|                 | %        | %      | %      | %      |
| Age             |          |        |        |        |
| <20             | 1.5      | 2.2    | 2.6    | 1.9    |
| 20–24           | 12.2     | 12.7   | 13.8   | 13.2   |
| 25–29           | 36.2     | 34.6   | 34.8   | 36.4   |
| 30–34           | 35.7     | 33.7   | 33.2   | 34.2   |
| ≥35             | 14.4     | 16.7   | 15.6   | 14.3   |
| Education       |          |        |        |        |
| Primary         | 2.4      | 3.1    | 3.9    | 2.7    |
| Secondary       | 34.8     | 38.5   | 38.8   | 35.0   |
| Higher ≤4 years | 37.8     | 35.6   | 37.3   | 36.1   |
| Higher >4 years | 21.3     | 19.2   | 20.5   | 22.2   |
| Missing         | 3.7      | 3.6    | 3.7    | 3.9    |
| Parity          |          |        |        |        |
| Nulliparous     | 54.9     | 61.7   | 68.2   | 70.7   |
| Multiparous     | 45.1     | 38.3   | 31.8   | 29.3   |
| Smoking         |          |        |        |        |
| No              | 90.9     | 89.3   | 85.8   | 85.6   |
| Yes             | 8.5      | 10.1   | 13.6   | 13.6   |
| Missing         | 0.7      | 0.6    | 0.6    | 0.7    |

|    |                         |      |      |      |      |
|----|-------------------------|------|------|------|------|
| 1  |                         |      |      |      |      |
| 2  |                         |      |      |      |      |
| 3  | Pre-pregnancy body mass |      |      |      |      |
| 4  | index                   |      |      |      |      |
| 5  | <20                     | 12.4 | 12.8 | 15.6 | 19.1 |
| 6  |                         |      |      |      |      |
| 7  | 20–24.9                 | 54.9 | 49.9 | 50.8 | 55.6 |
| 8  |                         |      |      |      |      |
| 9  | 25–29.9                 | 21.0 | 22.0 | 19.0 | 15.2 |
| 10 |                         |      |      |      |      |
| 11 | ≥30                     | 9.2  | 12.6 | 11.8 | 7.6  |
| 12 |                         |      |      |      |      |
| 13 | Missing                 | 2.5  | 2.7  | 2.9  | 2.4  |
| 14 | Mental distress         |      |      |      |      |
| 15 | No                      | 93.3 | 92.3 | 91.3 | 92.3 |
| 16 |                         |      |      |      |      |
| 17 | Yes                     | 6.8  | 7.7  | 8.7  | 7.7  |
| 18 | Adult physical violence |      |      |      |      |
| 19 | No                      | 85.5 | 83.9 | 83.6 | 84.7 |
| 20 |                         |      |      |      |      |
| 21 | Yes                     | 14.5 | 16.1 | 16.4 | 15.3 |
| 22 | Child physical violence |      |      |      |      |
| 23 | No                      | 94.5 | 94.4 | 94.1 | 94.3 |
| 24 |                         |      |      |      |      |
| 25 | Yes                     | 5.5  | 5.6  | 5.9  | 5.5  |
| 26 | Adult emotional abuse   |      |      |      |      |
| 27 | No                      | 83.6 | 82.1 | 81.3 | 82.5 |
| 28 |                         |      |      |      |      |
| 29 | Yes                     | 16.4 | 17.9 | 18.7 | 17.5 |
| 30 | Child emotional abuse   |      |      |      |      |
| 31 | No                      | 86.2 | 85.1 | 84.7 | 85.5 |
| 32 |                         |      |      |      |      |
| 33 | Yes                     | 13.8 | 14.9 | 15.3 | 14.5 |

34

35

36 The prevalence of adverse neonatal outcomes was generally highest in the youngest (<20 y)

37 and the oldest age groups (≥35 y) among smokers and women with primary school education.

38

39 A BMI ≥30 was associated with PTB and LBW and BMI <20 with SGA. Women who

40 reported mental distress also reported more PTB, LBW and SGA.

41

42

43

44

45

46

47 Among the 76 870 women enrolled, 9263 (12.1%) reported a history of mild sexual violence,

48 2102 (2.8%) moderate and 2746 (3.5%) severe. Women with a history of sexual violence

49 were significantly younger and they were more likely to have primary school education.

50

51 Additionally, these women more frequently reported smoking, a BMI ≥30 and mental distress.

52

53

54

55

56 These women more often experienced other types of violence both as children and adults

57 (data not provided in tables).

58

59

60

A lower gestational age at birth was observed for newborns from women who reported moderate and severe sexual violence with approximately two days when birth was provider-initiated (Table 2).

Table 2. Differences in gestational age for spontaneous and provider-initiated start of birth and birth weight for non-exposed women and women exposed to mild, moderate and severe sexual violence

|                                 | N= 76 870<br>(%) | Mean       | Crude estimate<br>$\beta$ (95% CI) | Adjusted estimate<br>$\beta$ (95% CI)* |
|---------------------------------|------------------|------------|------------------------------------|----------------------------------------|
| <b>Gestational age</b>          |                  |            |                                    |                                        |
| No sexual violence              | 62 699 (81.6)    | 279.7 days | 1                                  | 1                                      |
| <i>Mild sexual violence</i>     | 9263 (12.1)      |            |                                    |                                        |
| Spontaneous start               | 7323 (11.5)      | 279.9 days | 0.09 (-0.16; 0.33)                 | 0.22 (-0.04; -0.48)                    |
| Provider-initiated start        | 1940 (12.5)      | 280.3 days | 0.36 (-0.37; 1.08)                 | 0.64 (-0.11; 1.39)                     |
| <i>Moderate sexual violence</i> | 2162 (2.8)       |            |                                    |                                        |
| Spontaneous start               | 1670 (2.7)       | 279.3 days | -0.40 (-0.87; 0.06)                | -0.28 (-0.78; 0.21)                    |
| Provider-initiated start        | 492 (3.2)        | 277.6 days | -2.13 (-3.41; -0.84)               | -2.02 (-3.39; -0.67)                   |
| <i>Severe sexual violence</i>   | 2746 (3.6)       |            |                                    |                                        |
| Spontaneous start               | 2048 (3.3)       | 278.7 days | -0.91 (-1.37; -0.44)               | -0.65 (-1.15; -0.16)                   |
| Provider-initiated start        | 698 (4.5)        | 277.5 days | -2.24 (-3.47; -1.01)               | -1.92 (-3.22; -0.62)                   |
| <b>Birth weight</b>             |                  |            |                                    |                                        |
| No sexual violence              | 62 699 (81.6)    | 3594 g     | 1                                  | 1                                      |
| Mild sexual violence            | 9263 (12.1)      | 3597 g     | 2.03 (-9.26; 13.32)                | 0.04 (-9.16; 9.23)**                   |
| Moderate sexual violence        | 2162 (2.8)       | 3582 g     | -13.61 (-34.74; 7.51)              | 6.11 (-11.30; 23.52)**                 |
| Severe sexual violence          | 2746 (3.6)       | 3556 g     | -38.33 (-59.17; -17.49)            | -0.76 (-18.05; 16.53)**                |

\*Adjusted for maternal age, parity, education, smoking, body mass index and mental distress

\*\*Additional adjustment for gestational age

Among women with a spontaneous start of birth, the gestational age was approximately one half of a day shorter when women reported severe sexual violence. These findings were significant in an adjusted analysis. A crude analysis showed that women who reported a history of severe violence delivered on average 38.3 g lighter children, a difference that disappeared when controlling for gestational age, mother's age, parity, education, smoking, BMI and mental distress. There were no differences regarding birth weight between women with a history of mild or moderate sexual violence compared with non-abused women.



Results from the logistic regression analysis are presented in Table 3.

Table 3. Odds of preterm birth (PTB), low birth weight (LBW) and small for gestational age (SGA) with 95% confidence intervals (CI) according to the different levels of sexual violence

|                          | N (%)         | Prevalence (%)    | Crude odds ratio (95% CI) | Adjusted odds ratio (95% CI)* |
|--------------------------|---------------|-------------------|---------------------------|-------------------------------|
| <b>PTB</b>               |               | <b>3620 (4.7)</b> |                           |                               |
| No sexual violence       | 62 699 (81.6) | 2931 (4.7)        | 1                         | 1                             |
| Mild sexual violence     | 9263 (12.1)   | 412 (4.4)         | 0.95 (0.85-1.06)          | 0.93 (0.83-1.03)              |
| Moderate sexual violence | 2162 (2.8)    | 115 (5.3)         | 1.15 (0.95-1.39)          | 1.14 (0.93-1.39)              |
| Severe sexual violence   | 2746 (3.6)    | 162 (5.9)         | 1.28 (1.08-1.51)          | 1.15 (0.97-1.37)              |
| <b>LBW</b>               |               | <b>2107 (2.7)</b> |                           |                               |
| No sexual violence       | 62 699 (81.6) | 1681 (2.7)        | 1                         | 1                             |
| Mild sexual violence     | 9263 (12.1)   | 257 (2.8)         | 1.04 (0.91-1.18)          | 0.98 (0.85-1.12)              |
| Moderate sexual violence | 2162 (2.8)    | 75 (3.5)          | 1.30 (1.03-1.65)          | 1.19 (0.93-1.53)              |
| Severe sexual violence   | 2746 (3.6)    | 94 (3.4)          | 1.29 (1.04-1.59)          | 1.07 (0.85-1.34)              |
| <b>SGA</b>               |               | <b>6257 (8.1)</b> |                           |                               |
| No sexual violence       | 62 699 (81.6) | 5061 (8.1)        | 1                         | 1                             |
| Mild sexual violence     | 9263 (12.1)   | 768 (8.3)         | 1.03 (0.95-1.12)          | 1.00 (0.91-1.08)              |
| Moderate sexual violence | 2162 (2.8)    | 178 (8.3)         | 1.02 (0.87-1.19)          | 0.95 (0.80-1.12)              |
| Severe sexual violence   | 2746 (3.6)    | 250 (9.1)         | 1.14 (1.00-1.30)          | 1.05 (0.91-1.21)              |

\*Adjusted for maternal age, parity, education, smoking, body mass index and mental distress

Women who reported severe sexual violence had higher odds of PTB, LBW and SGA in a crude analysis, an association that was attenuated and no longer significant when adjusted for maternal age, parity, education, smoking, BMI and mental distress. Other types of violence, both as a child and adult, had small attenuating effects on the odds ratios and were not included in the final models.

The sensitivity analysis, in which we examined the association between a history of sexual violence and SGA and LBW in a sub-sample of women who had a spontaneous term birth, showed the same pattern as in the total sample reported in Table 3. Women who reported severe sexual violence had higher odds of LBW and SGA in a crude analysis but not in the adjusted analysis (Data not provided in tables).

1  
2  
3 A crude analysis was used to examine if the timing of the violence was associated with  
4  
5 adverse outcome. Women who reported recent sexual violence had a higher risk for LBW  
6  
7 (OR 1.60 95% CI 1.04-2.17) compared with non-abused women. The association was no  
8  
9 longer significant in the adjusted analysis. In our study, 684 (0.9%) women reported recent  
10  
11 sexual violence (mild, moderate and severe) and 13 487 (17.5%) previous sexual violence  
12  
13 (Supplementary Table S24). There was no association between recent severe sexual violence  
14  
15 (rape) and adverse neonatal outcome (Supplementary Table S32). There were 66 (0.1%)  
16  
17 women who reported ~~recent rape during pregnancy or the last 6 or in 12 months in~~ this study.  
18  
19  
20  
21  
22  
23

## 24 DISCUSSION

### 25 Main outcome

26  
27 We found that moderate and severe sexual violence were associated with a reduction in  
28  
29 gestational age at birth. The largest effect was observed when birth was provider-initiated  
30  
31 among women exposed to moderate or severe violence. These women had an approximately  
32  
33 two-day reduction in gestational age. There was no significant association between sexual  
34  
35 violence and PTB, LBW or SGA in the adjusted analysis.  
36  
37  
38  
39  
40  
41

### 42 Strength

43  
44 This study, based on information from a large population-based study, the Norwegian Mother  
45  
46 and Child Cohort study (MoBa), which is linked to the Medical Birth Registry (MBRN), gave  
47  
48 a unique opportunity to assess the association between sexual violence and outcome for  
49  
50 newborns. The validity of the data in ~~the~~ MoBa has in earlier research been described as  
51  
52 sufficient for large-scale epidemiologic studies.[29, 30] Our study was strengthened by the  
53  
54 fact that the information on the different outcome variables was collected prospectively from  
55  
56 the quality-assessed MBRN.[31] The outcomes in this study are part of a complex  
57  
58  
59  
60

phenomenon that has several different risk factors.[2] The setting in this study, with small social and health inequalities, may therefore be suitable to isolate the effect of sexual violence on adverse neonatal outcomes.

### Limitations

There are also limitations to our study. The participation rate of 40.6% in MoBa is low, and MoBa suffers to some extent from selection bias. The women included in the study are older, have more education, smoke less and are less likely to be of a non-Norwegian origin than the Norwegian population. Although it is likely that there is a socioeconomic gradient that influence prevalence estimates, a recent study by Nilsen et al. has found that this may affect the prevalence estimates, but there was no evidence that the exposure-outcome associations in the MoBa study were affected by selection bias.[32] This socioeconomic gradient may also Furthermore, as preterm birth is associated with ethnicity, the ethnic homogeneous sample in MoBa may limit the generalisability of our findings. The lack of a validated instrument for measuring the exposure is a limitation to this study, and violence measured in modules as part of a larger questionnaire, as that in MoBa, may achieve a lower disclosure rate.[5] However, a similar prevalence to that found in our study was reported in a Nordic study examining sexual violence and health.[33] The exposure was measured in gestational week 17, and sexual violence during pregnancy after this is therefore not included. In addition, we have no information on the context and frequency of the violence or information regarding the perpetrator.

To our knowledge, no studies have examined the influence of lifetime sexual violence reported during pregnancy on the gestational age at birth for newborns. There were minor differences in the gestational age between abused and non-abused women in this study, and

1  
2  
3 the clinical importance of our findings for the health of the newborn is most likely limited.  
4  
5 However, the difference between the provider-initiated and spontaneous initiation of birth  
6  
7 may be of interest. Shorter provider-initiated pregnancies may suggest an increase in elective  
8  
9 inductions and elective caesarean sections for those exposed to violence. This is supported by  
10  
11 others [34, 35] and in our previous study on sexual violence and maternal outcome.[36]  
12  
13 Studies have emphasised the meaning of control for abused women when giving birth,[37]  
14  
15 and choosing a planned start of birth may help the abused women remain in control.  
16  
17  
18  
19

20  
21 Unlike the current meta-analysis (~~not yet published~~), mentioned in a WHO report (~~not yet~~  
22  
23 ~~published~~);[5] we did not find sexual violence to be associated with PTB and LBW in  
24  
25 adjusted analysis. To our knowledge, no study has found an association between violence and  
26  
27 SGA. The studies included in the meta-analysis ~~were limited to investigated both~~ sexual  
28  
29 and/or physical intimate partner violence, ~~in contrast to our study, which investigated lifetime~~  
30  
31 ~~sexual violence~~. However, our findings are supported by a Canadian population based study  
32  
33 with a sample of 6 421 pregnant women [17] and a prospective cohort study including 1 555  
34  
35 women from the US [15]. The exposure in these studies was physical and sexual violence  
36  
37 prior to pregnancy and in pregnancy without being limited to an intimate partner. [15, 17]  
38  
39 These studies showed no association between violence and PTB or LBW.  
40  
41  
42  
43  
44

45 The nature of the exposure measured in the MoBa study makes it difficult to directly compare  
46  
47 our findings to others, mainly because we examined lifetime sexual violence by any  
48  
49 perpetrator, not limited to intimate partner. Sexual violence is considered to be traumatic for  
50  
51 the victim regardless if the perpetrator is a partner or not.[38] When an intimate partner is the  
52  
53 perpetrator, sexual violence may in addition be accompanied by controlling behaviour and  
54  
55 include both physical and emotional abuse.[38] Rape by strangers is usually a single violent  
56  
57  
58  
59  
60

1  
2  
3 event with a higher risk of physical injury. Both forms of violence are associated with adverse  
4 health effects, [5, 38] but the effect may differ. -Studies on the health effects of non-partner  
5 sexual violence are limited with less robust data than for intimate partner violence.[5]  
6  
7 Unfortunately, we were not able to examine the effect of the perpetrator in this study because  
8 the MoBa study does not provide this information. However, research suggests that a  
9 substantial proportion of sexual violence occurs within an intimate relationship.[38] Our data  
10 from the MoBa does not differentiate between intimate partner violence and sexual abuse by  
11 non-partnersIt, -but it is not unlikely that the question about severe sexual violence (rape)  
12 primarily reflects non-partner sexual abuse. -and that mild sexual violence (pressured to  
13 sexual acts) may be a more psychological exposure. Our crude analyses showed different  
14 results, with a significantly higher OR for adverse neonatal outcome among women who  
15 reported severe sexual violence, thus supporting the idea that the different levels of violence  
16 are different exposures. The use of a more comprehensive instrument when measuring the  
17 exposure, with multiple response options regarding context, frequency and perpetrator would  
18 have clarified this further and provided more comprehensive knowledge about the nature of  
19 the violence. Nevertheless, we had the opportunity to control for both emotional and physical  
20 abuse in preliminary analysis and this did not change the ORs.  
21  
22  
23  
24  
25  
26  
27  
28  
29  
30  
31  
32  
33  
34  
35  
36  
37  
38  
39  
40  
41  
42

43 =

44  
45  
46  
47 Several pathways between sexual violence and adverse neonatal outcomes are suggested, both  
48 direct and indirect.[5] The direct pathway of violence during pregnancy can lead to a preterm  
49 birth, and examples of indirect pathways include more health-risk behaviours, depression and  
50 stress/anxiety.[5, 40] Both experienced violence and living in an abusive environment can  
51 cause increased stress levels, which could be on the pathway between abuse and adverse  
52  
53  
54  
55  
56  
57  
58  
59  
60

1  
2  
3 neonatal outcome. Maternal exposure to stress can influence the hypothalamic-pituitary axis  
4 (HPA) hormones, and it is suggested that changes in these hormones may cause negative  
5 outcomes, such as a reduction in gestational age and foetal growth restriction.[4, 41]  
6  
7

8  
9 The prevalence of abuse during pregnancy is small in our study and may have decreased the  
10 power to detect an association between violence during pregnancy and adverse neonatal  
11

12 outcomes, an association that is supported by other studies.[10, 14, 4239, 4340] Living in an  
13

14 abusive relationship may have stopped women from disclosing the violence. In our study,  
15

16 sexual violence was assessed approximately in gestational week 17, and events of violence  
17

18 after that ~~may~~ have been missed. Some studies suggest that the risk of sexual violence may  
19

20 increase with the length of the pregnancy for women that are exposed.[41]- The studies that  
21

22 report the highest prevalence of violence have measured this several times during pregnancy.  
23

24 [6] Studies have reported a violence prevalence during pregnancy of between 3 to 19%.[6,  
25

26 442], including both ~~A direct comparison to our study is difficult because these numbers~~  
27

28 estimate both physical and sexual violence. ~~abuse during pregnancy; they may suggest that~~  
29

30 sexual violence during pregnancy is underreported in our study. Underreporting among the  
31

32 non-exposed may have caused a misclassification that has diminished the associations  
33

34 between sexual violence and neonatal outcomes in our study. Since the exposure was  
35

36 collected before the outcome, it is unlikely that misclassification was related to the outcome,  
37

38 thus resulting in a nondifferential misclassification that has biased the result towards the null.  
39

40 Living in an abusive relationship may also stop women from disclosing the violence.  
41

42 However, our prevalence of recent sexual (0.9%) violence is similar to the prevalence of 1%  
43

44 reported in a survey that assessed intimate partner violence in a national population based  
45

46 study on violence among a representative sample of Norwegian women.[453] This number  
47

48 reflects the prevalence of sexual violence reported during the last year. r, not especially  
49

50 among pregnant women.  
51  
52  
53  
54  
55  
56  
57  
58  
59  
60

1  
2  
3  
4  
5 Several pathways between sexual violence and adverse neonatal outcomes are suggested, both  
6 direct and indirect.[5] The direct pathway of violence during pregnancy can cause immediate  
7 complications as bleeding, rupture of membranes and PTB, and examples of indirect  
8 pathways include more health-risk behaviours, depression and stress/anxiety.[5, 44] Both  
9 experienced violence and living in an abusive environment can cause increased stress levels,  
10 which could be on the pathway between abuse and adverse neonatal outcome. Maternal  
11 exposure to stress can influence the hypothalamic pituitary axis (HPA) hormones, and it is  
12 suggested that changes in these hormones may cause negative outcomes, such as a reduction  
13 in gestational age and fetal growth restriction.[4, 45] It has been proposed that mental distress  
14 and symptoms of depression are on the causal pathway between violence and adverse health  
15 outcome, yet it has also been suggested that women with mental health difficulties are more  
16 likely to be victims of violence.[46] Because the relationship may be bi-directional, we chose  
17 to control for mental distress in our study. Similarly, the health risk behaviours smoking and  
18 BMI may be on the pathway between sexual violence and neonatal outcome. Nevertheless, we  
19 kept these covariates in the regression analysis because they are especially related to birth  
20 weight and PTB.[3, 47]  
21  
22  
23  
24  
25  
26  
27  
28  
29  
30  
31  
32  
33  
34  
35  
36  
37  
38  
39  
40  
41  
42  
43  
44

## 45 **Conclusion**

46  
47 Overall, our findings provide no evidence for an association between lifetime sexual violence  
48 and adverse neonatal outcomes. A small significant effect on the gestational age at birth was  
49 detected, but the clinical importance of this is most likely limited for the health of the  
50 newborn. PTB, LBW and SGA all have complex origins with multiple possible pathways.[1,  
51  
52  
53  
54  
55  
56  
57  
58  
59  
60  
2] Although we did not find an association between sexual violence and PTB, LBW or SGA

1  
2  
3 in adjusted analyses, crude analyses in our study suggested that sexual violence may be a risk  
4  
5 factor for adverse neonatal outcomes for some women; however, for the majority of women,  
6  
7 the relationship was confounded by other risk factors. It is possible that these factors were  
8  
9 the result of prior exposure to violence, but this could not be assessed in this study. Antenatal  
10  
11 care is one of the most important entry points in which women seek health care without  
12  
13 necessarily disclosing ongoing exposure to violence or a history of sexual violence. It is  
14  
15 recommended that caregivers and clinicians ask women about exposure to violence when  
16  
17 assessing conditions that may be complicated by violence,[486] and more knowledge about  
18  
19 this conditions is needed. Additionally, antenatal care may offer opportunities for women to  
20  
21 receive help, both if they are exposed to violence and in providing assistance to change  
22  
23 behavioural factors contributing to adverse outcomes.  
24  
25  
26  
27  
28

### 29 **Competing interests**

30  
31 None.  
32  
33  
34

### 35 **Contributions to authorship**

36  
37 LH participated in the conception and design of the study, performed the analysis and drafted  
38  
39 the manuscript. BS participated in the conception of the study, advised on the statistical  
40  
41 analyses and drafting of the manuscript. SV advised on the statistical analyses and the drafting  
42  
43 of the manuscript. ML participated in the conception and design of the study, advised on the  
44  
45 statistical analyses and participated in drafting the manuscript. All authors read and approved  
46  
47 the final version.  
48  
49  
50  
51  
52

### 53 **Funding**

54  
55 The Norwegian Mother and Child Cohort Study is supported by the Norwegian Ministry of  
56  
57 Health and the Ministry of Education and Research, NIH/NIEHS (contract no N01-ES-  
58  
59  
60



1  
2  
3 75558), NIH/NINDS (grant no.1 UO1 NS 047537-01 and grant no.2 UO1 NS 047537-06A1),  
4  
5 and the Norwegian Research Council/FUGE (grant no. 151918/S10). The first author of this  
6  
7 article is supported by [South-Eastern Norway Regional Health Authority \(grant no.](#)  
8  
9 [2012010\)The Research Council of Norway \(grant no. 204292/H10\)](#), and the second author is  
10  
11 supported by the [The Research Council of Norway \(grant no. 204292/H10\)](#), [South Eastern](#)  
12  
13 [Norway Regional Health Authority \(grant no. 2012010\)](#).  
14  
15  
16  
17  
18

### 19 Acknowledgement

20 We are grateful to all the participating families in Norway who take part in this ongoing  
21  
22 cohort study.  
23  
24  
25  
26  
27

### 28 Reference List

- 29 (1) Green NS, Damus K, Simpson JL, et al. Research agenda for preterm birth:  
30 recommendations from the March of Dimes. *Am J Obstet Gynecol* 2005;193:626-35.
- 31 (2) March of Dimes, PMNCH, Save The Children, WHO. Born Too Soon: The Global  
32 Action Report on Preterm Birth. Geneva: World Health Organization 2012
- 33 (3) Wilcox AJ. On the importance-and the unimportance-of birth weight. *Int J Epidemiol*  
34 2001;30:1233-41.
- 35 (4) Lazinski MJ, Shea AK, Steiner M. Effects of maternal prenatal stress on offspring  
36 development: a commentary. *Arch Womens Ment Health* 2008;11:363-75.
- 37 (5) Garcia-Moreno C, Pallitto C, Devries K, et al. Global and regional estimates of  
38 violence against women: prevalence and health effects of intimate partner violence  
39 and non-partner sexual violence. Geneva: World Health Organization; 2013.
- 40 (6) Campbell J, Garcia-Moreno C, Sharps P. Abuse During Pregnancy in Industrialized  
41 and Developing Countries. *Violence Against Women* 2004;10:770-89.
- 42 (7) Garcia-Moreno C, Jansen HA, Ellsberg M, et al. Prevalence of intimate partner  
43 violence: findings from the WHO multi-country study on women's health and  
44 domestic violence. *Lancet* 2006;368:1260-9.
- 45 (8) Sanchez SE, Alva AV, Diez CG, et al. Risk of spontaneous preterm birth in relation to  
46 maternal exposure to intimate partner violence during pregnancy in Peru. *Matern*  
47 *Child Health J* 2013;17:485-92.  
48  
49  
50  
51  
52  
53  
54  
55  
56  
57  
58  
59  
60

- 1  
2  
3 (9) Leeners B, Stiller R, Block E, et al. Pregnancy complications in women with  
4 childhood sexual abuse experiences. *J Psychosom Res* 2010;69:503-10.  
5  
6 (10) Nunes MA, Camey S, Ferri CP, et al. Violence during pregnancy and newborn  
7 outcomes: a cohort study in a disadvantaged population in Brazil. *Eur J Public Health*  
8 2011;21(1):92-7.  
9  
10 (11) Rodrigues T, Rocha L, Barros H. Physical abuse during pregnancy and preterm  
11 delivery. *Am J Obstet Gynecol* 2008;198:171-6.  
12  
13 (12) Noll JG, Schulkin J, Trickett PK, et al. Differential pathways to preterm delivery for  
14 sexually abused and comparison women. *J Pediatr Psychol* 2007;32:1238-48.  
15  
16 (13) Silverman JG, Decker MR, Reed E, et al. A. Intimate partner violence victimization  
17 prior to and during pregnancy among women residing in 26 U.S. states: associations  
18 with maternal and neonatal health. *Am J Obstet Gynecol* 2006;195:140-8.  
19  
20 (14) Murphy CC, Schei B, Myhr TL, et al. Abuse: a risk factor for low birth weight? A  
21 systematic review and meta-analysis. *CMAJ* 2001;164:1567-72.  
22  
23 (15) Fried LE, Cabral H, Amaro H, et al. Lifetime and during pregnancy experience of  
24 violence and the risk of low birth weight and preterm birth. *J Midwifery Womens*  
25 *Health* 2008 ;53:522-8.  
26  
27 (16) Janssen PA, Holt VL, Sugg NK, et al. Intimate partner violence and adverse  
28 pregnancy outcomes: a population-based study. *Am J Obstet Gynecol* 2003;188:1341-  
29 7.  
30  
31 (17) Urquia ML, O'Campo PJ, Heaman MI, et al. Experiences of violence before and  
32 during pregnancy and adverse pregnancy outcomes: an analysis of the Canadian  
33 Maternity Experiences Survey. *BMC Pregnancy Childbirth* 2011;11:42.  
34  
35 (18) Altarac M, Strobino D. Abuse during pregnancy and stress because of abuse during  
36 pregnancy and birthweight. *J Am Med Womens Assoc* 2002;57:208-14.  
37  
38 (19) Cokkinides VE, Coker AL, Sanderson M, et al. Physical violence during pregnancy:  
39 maternal complications and birth outcomes. *Obstet Gynecol* 1999;93:661-6.  
40  
41 (20) Grimstad H, Schei B, Backe B, et al. Physical abuse and low birthweight: a case-  
42 control study. *Br J Obstet Gynaecol* 1997;104:1281-7.  
43  
44 (21) Kaye DK, Mirembe FM, Bantebya G, et al. Domestic violence during pregnancy and  
45 risk of low birthweight and maternal complications: a prospective cohort study at  
46 Mulago Hospital, Uganda. *Trop Med Int Health* 2006;11:1576-84.  
47  
48 (22) Magnus P, Irgens LM, Haug K, et al. Cohort profile: the Norwegian Mother and Child  
49 Cohort Study (MoBa). *Int J Epidemiol* 2006;35:1146-50.  
50  
51 (23) Lukasse M, Henriksen L, Vangen S, et al. Sexual violence and pregnancy-related  
52 physical symptoms. *BMC Pregnancy Childbirth* 2012;12:83.  
53  
54  
55  
56  
57  
58  
59  
60

- 1  
2  
3 (24) Henriksen L, Vangen S, Schei B, et al. Sexual violence and antenatal hospitalization. *Birth* 2013;40:281-8.
- 4  
5  
6 (25) Skjaerven R, Gjessing HK, Bakketeig LS. et al. Birthweight by gestational age in  
7 Norway. *Acta Obstet Gynecol Scand* 2000;79:440-9.
- 8  
9 (26) Strand BH, Dalgard OS, Tambs K, et al. Measuring the mental health status of the  
10 Norwegian population: a comparison of the instruments SCL-25, SCL-10, SCL-5 and  
11 MHI-5 (SF-36). *Nord J Psychiatry* 2003;57:113-8.
- 12  
13 (27) Field A. Discovering statistics using SPSS. Los Angeles: SAGE; 2009.
- 14  
15 (28) Veierød MB, Lydersen S, Laake P, et at. Medical statistics: in clinical and  
16 epidemiological research. Oslo: Gyldendal akademisk; 2012.
- 17  
18 (29) Kvalvik LG, Nilsen RM, Skjaerven R, et al. Self-reported smoking status and plasma  
19 cotinine concentrations among pregnant women in the Norwegian Mother and Child  
20 Cohort Study. *Pediatr Res* 2012 ;72:101-7.
- 21  
22 (30) Furu K, Karlstad O, Skurtveit S, et al. High validity of mother-reported use of  
23 antiasthmatics among children: a comparison with a population-based prescription  
24 database. *J Clin Epidemiol* 2011;64:878-84.
- 25  
26 (31) Irgens LM. The Medical Birth Registry of Norway. Epidemiological research and  
27 surveillance throughout 30 years. *Acta Obstet Gynecol Scand* 2000;7:435-9.
- 28  
29 (32) Nilsen RM, Vollset SE, Gjessing HK, et al. Self-selection and bias in a large  
30 prospective pregnancy cohort in Norway. *Paediatr Perinat Epidemiol* 2009 23:597-  
31 608.
- 32  
33 (33) Hilden M, Schei B, Swahnberg K, et al. A history of sexual abuse and health: a Nordic  
34 multicentre study. *BJOG* 2004;111:1121-7.
- 35  
36 (34) Nerum H, Halvorsen L, Straume B, et al. Different labour outcomes in primiparous  
37 women that have been subjected to childhood sexual abuse or rape in adulthood: a  
38 case-control study in a clinical cohort. *BJOG* 2013;120:487-495.
- 39  
40 (35) Lukasse M, Vangen S, Oian P, et al. Childhood abuse and caesarean section among  
41 primiparous women in the Norwegian Mother and Child Cohort Study. *BJOG*  
42 2010;117:1153-7.
- 43  
44 (36) Henriksen L, Schei B, Vangen S, et al. Sexual violence and mode of delivery: a  
45 population-based cohort study. *BJOG*. ~~In press 2014.~~ [2014 121\(10\):1237-1244](#)
- 46  
47 (37) Montgomery E. Feeling Safe: A Metasynthesis of the Maternity Care Needs of  
48 Women Who Were Sexually Abused in Childhood. *Birth* 2013;40:88-95.
- 49  
50  
51  
52  
53 (38) [Abrahams N, Devries K, Watts C, Pallitto C, Petzold M, Shamu S, et al. Worldwide](#)  
54 [prevalence of non-partner sexual violence: a systematic review. \*Lancet\*.](#)  
55 [2014;383\(9929\):1648-54. Epub 2014/02/18.](#)  
56  
57  
58  
59  
60

Campbell J, Torres S, Ryan J, et al. Physical and nonphysical partner abuse and other risk factors for low birth weight among full term and preterm babies: a multiethnic case control study. *Am J Epidemiol* 1999;150:714-26.

(39) Webster J, Chandler J, Battistutta D. Pregnancy outcomes and health care use: effects of abuse. *Am J Obstet Gynecol* 1996;174:760-7

(4039) Faramarzi M, Esmaelzadeh S, Mosavi S. Prevalence, maternal complications and birth outcome of physical, sexual and emotional domestic violence during pregnancy. *Acta Med Iran* 2005;43:115-22. Leeners B, Neumaier-Wagner P, Quarg AF, et al. Childhood sexual abuse (CSA) experiences: an underestimated factor in perinatal care. *Acta Obstet Gynecol Scand* 2006;85:971-6.

(4140) Valladares E, Ellsberg M, Pena R, et al. Physical partner abuse during pregnancy: a risk factor for low birth weight in Nicaragua. *Obstet Gynecol* 2002;100:700-5.

(41) Shah PS, Shah J. Maternal exposure to domestic violence and pregnancy and birth outcomes: a systematic review and meta-analyses. *J Womens Health (Larchmt)*. 2010;19:2017-31. Valladares E, Pena R, Ellsberg M, et al. Neuroendocrine response to violence during pregnancy--impact on duration of pregnancy and fetal growth. *Acta Obstet Gynecol Scand* 2009;88:818-23.

(42) Sharps PW, Laughon K, Giangrande SK. Intimate partner violence and the childbearing year: maternal and infant health consequences. *Trauma Violence Abuse* 2007;8:105-16. Faramarzi M, Esmaelzadeh S, Mosavi S. Prevalence, maternal complications and birth outcome of physical, sexual and emotional domestic violence during pregnancy. *Acta Med Iran* 2005;43:115-22.

(43) Neroien AI, Schei B. Partner violence and health: results from the first national study on violence against women in Norway. *Scand J Public Health* 2008;36:161-8. Valladares E, Ellsberg M, Pena R, et al. Physical partner abuse during pregnancy: a risk factor for low birth weight in Nicaragua. *Obstet Gynecol* 2002;100:700-5.

(44) Leeners B, Neumaier-Wagner P, Quarg AF, et al. Childhood sexual abuse (CSA) experiences: an underestimated factor in perinatal care. *Acta Obstet Gynecol Scand* 2006;85:971-6.

Sharps PW, Laughon K, Giangrande SK. Intimate partner violence and the childbearing year: maternal and infant health consequences. *Trauma Violence Abuse* 2007;8:105-16. (45) Valladares E, Pena R, Ellsberg M, et al. Neuroendocrine response to violence during pregnancy--impact on duration of pregnancy and fetal growth. *Acta Obstet Gynecol Scand* 2009;88:818-23. Neroien AI, Schei B. Partner violence and health: results from the first national study on violence against women in Norway. *Scand J Public Health* 2008;36:161-8.

(46) Devries KM, Mak JY, Bacchus LJ, Child JC, Falder G, Petzold M, et al. Intimate partner violence and incident depressive symptoms and suicide attempts: a systematic review of longitudinal studies. *PLoS Med* 2013;10:e1001439. World health organisation. Responding to intimate partner violence and sexual violence against women: WHO clinical and policy guidelines. Geneva: WHO; 2013

1  
2  
3  
4  
5  
6  
7  
8  
9  
10  
11  
12  
13  
14  
15  
16  
17  
18  
19  
20  
21  
22  
23  
24  
25  
26  
27  
28  
29  
30  
31  
32  
33  
34  
35  
36  
37  
38  
39  
40  
41  
42  
43  
44  
45  
46  
47  
48  
49  
50  
51  
52  
53  
54  
55  
56  
57  
58  
59  
60

(47) McDonald SD, Han Z, Mulla S, Beyene J. Overweight and obesity in mothers and risk of preterm birth and low birth weight infants: systematic review and meta-analyses. *BMJ* 2010;341:3428.

(48) World health organisation. Responding to intimate partner violence and sexual violence against women: *WHO clinical and policy guidelines*. Geneva: WHO; 2013.

For peer review only

**Figure 1. Inclusion and exclusion process**

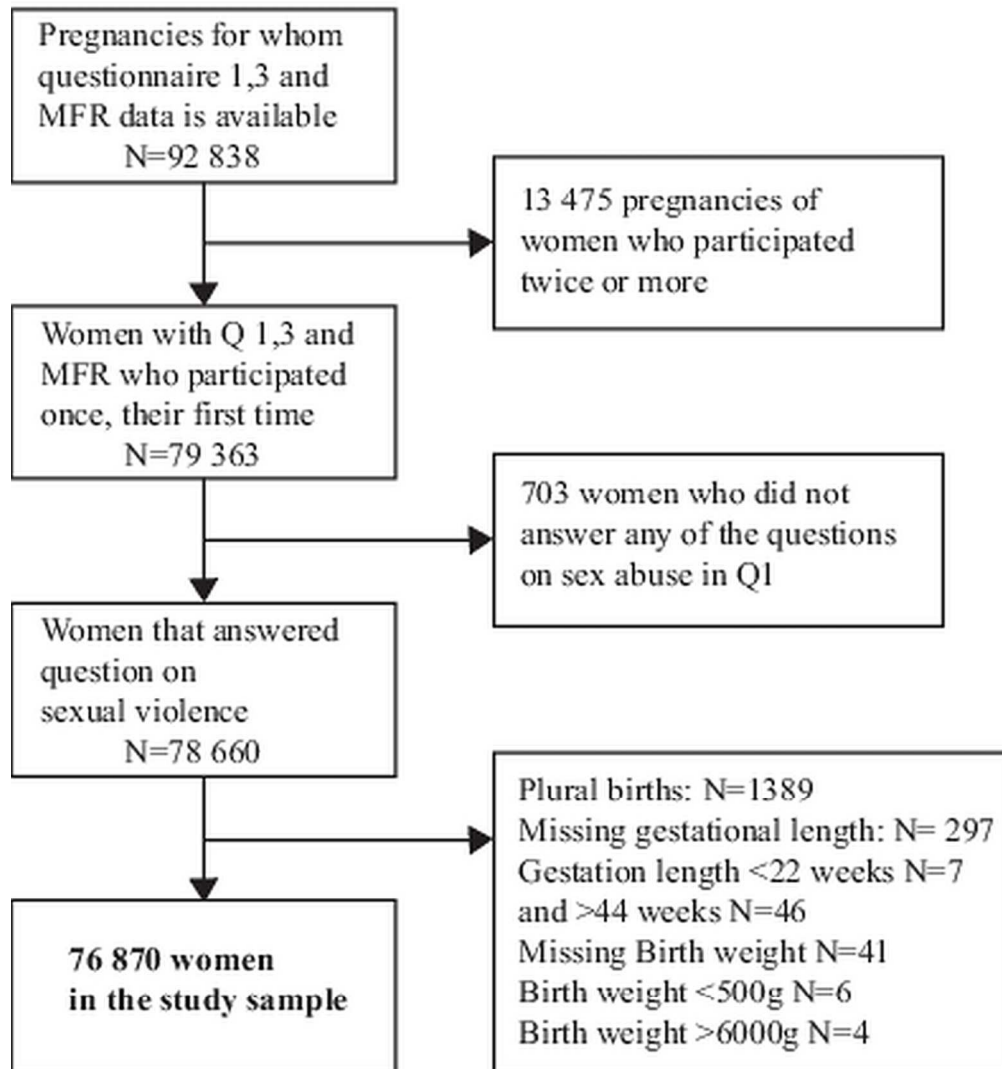

90x107mm (300 x 300 DPI)

Table S1. Questions on sexual violence in The Norwegian Mother and Child Cohort Study (MoBa)

The first version, answered by 1712 women (version A):

**Have you ever in been pressured or forced to sexual relations?**

*(Fill in one or several boxes.)*

|                                | Last 12 months           | Earlier                  |
|--------------------------------|--------------------------|--------------------------|
| No, never.....                 | <input type="checkbox"/> | <input type="checkbox"/> |
| Yes, pressured.....            | <input type="checkbox"/> | <input type="checkbox"/> |
| Yes, forced with violence..... | <input type="checkbox"/> | <input type="checkbox"/> |
| Yes, raped.....                | <input type="checkbox"/> | <input type="checkbox"/> |

The questions used in the other versions:

**Have you ever in been pressured or forced to sexual relations?**

*(Fill in one or several boxes.)*

|                                | During this pregnancy    | Last 6 months before pregnancy | Earlier                  |
|--------------------------------|--------------------------|--------------------------------|--------------------------|
| No, never.....                 | <input type="checkbox"/> | <input type="checkbox"/>       | <input type="checkbox"/> |
| Yes, pressured.....            | <input type="checkbox"/> | <input type="checkbox"/>       | <input type="checkbox"/> |
| Yes, forced with violence..... | <input type="checkbox"/> | <input type="checkbox"/>       | <input type="checkbox"/> |
| Yes, raped.....                | <input type="checkbox"/> | <input type="checkbox"/>       | <input type="checkbox"/> |

Table S2: Odds of preterm birth (PTB), low birth weight (LBW) and small for gestational age (SGA) with 95% confidence intervals (CI) according to previous and recent sexual violence

|                          | N (%)         | Prevalence (%)    | Crude odds ratio (95% CI) | Adjusted odds ratio (95% CI) |
|--------------------------|---------------|-------------------|---------------------------|------------------------------|
| <b>PTB</b>               |               | <b>3620 (4.7)</b> |                           |                              |
| No sexual violence       | 62 699 (81.6) | 2931 (4.7)        | 1                         | 1                            |
| Previous sexual violence | 13487 (17.5)  | 650 (4.8)         | 1.03 (0.95-1.13)          | 0.99 (0.90-1.09)             |
| Recent sexual violence   | 684 (0.9)     | 39 (5.7)          | 1.23 (0.89-1.71)          | 1.17 (0.83-1.65)             |
| <b>LBW</b>               |               | <b>2107 (2.7)</b> |                           |                              |
| No sexual violence       | 62 699 (81.6) | 1681 (2.7)        | 1                         | 1                            |
| Previous sexual violence | 13 487 (17.5) | 397 (2.9)         | 1.10 (0.99-1.23)          | 1.0 (0.86-1.12)              |
| Recent sexual violence   | 684 (0.9)     | 29 (4.2)          | 1.60 (1.04-2.33)          | 1.45 (0.97-2.17)             |
| <b>SGA</b>               |               | <b>6257 (8.1)</b> |                           |                              |
| No sexual violence       | 62 699 (81.6) | 5061 (8.1)        | 1                         | 1                            |
| Previous sexual violence | 13 487 (17.5) | 1136 (8.4)        | 1.05 (0.98-1.12)          | 0.98 (0.92-1.06)             |
| Recent sexual violence   | 684 (0.9)     | 60 (8.8)          | 1.10 (0.84-1.43)          | 1.18 (0.90-1.56)             |

\*Adjusted for maternal age, parity, education, smoking, body mass index and mental distress



Table S3: Odds of preterm birth (PTB), low birth weight (LBW) and small for gestational age (SGA) with 95% confidence intervals (CI) according to previous and recent severe violence (rape)

|               | <b>N (%)</b>  | <b>Prevalence (%)</b> | <b>Crude odds ratio (95% CI)</b> | <b>Adjusted odds ratio (95% CI)*</b> |
|---------------|---------------|-----------------------|----------------------------------|--------------------------------------|
| <b>PTB</b>    |               | <b>3620 (4.7)</b>     |                                  |                                      |
| No rape       | 74 124 (96.4) | 3458 (4.7)            | 1                                | 1                                    |
| Previous rape | 2680 (3.5)    | 157 (5.9)             | 1.27 (1.08-1.50)                 | 1.14 (0.97-1.36)                     |
| Recent rape   | 66 (0.1)      | 5 (7.6)               | 1.68 (0.67-4.17)                 | 1.72 (0.68-4.33)                     |
| <b>LBW</b>    |               | <b>2107 (2.7)</b>     |                                  |                                      |
| No rape       | 74 124 (96.4) | 2013(2.7)             | 1                                | 1                                    |
| Previous rape | 2680 (3.5)    | 91 (3.4)              | 1.26 (1.02-1.56)                 | 1.06 (0.84-1.33)                     |
| Recent rape   | 66 (0.1)      | 3 (4.5)               | 1.71 (0.54-5.44)                 | 1.55 (0.48-5.02)                     |
| <b>SGA</b>    |               | <b>6257 (8.1)</b>     |                                  |                                      |
| No rape       | 74 124 (96.4) | 6007 (8.1)            | 1                                | 1                                    |
| Previous rape | 2680 (3.5)    | 247 (9.2)             | 1.15 (1.01-1.32)                 | 1.06 (0.92-1.23)                     |
| Recent rape   | 66 (0.1)      | 3 (4.5)               | 0.54 (0.17-1.72)                 | 0.55 (0.17-1.79)                     |

\*Adjusted for maternal age, parity, education, smoking, body mass index and mental distress

STROBE 2007 (v4) Statement—Checklist of items that should be included in reports of *cohort studies*

| Section/Topic            | Item # | Recommendation                                                                                                                                                                                                                                | Reported on page #     |
|--------------------------|--------|-----------------------------------------------------------------------------------------------------------------------------------------------------------------------------------------------------------------------------------------------|------------------------|
| Title and abstract       | 1      | (a) Indicate the study's design with a commonly used term in the title or the abstract                                                                                                                                                        | page 1                 |
|                          |        | (b) Provide in the abstract an informative and balanced summary of what was done and what was found                                                                                                                                           | page 2                 |
| <b>Introduction</b>      |        |                                                                                                                                                                                                                                               |                        |
| Background/rationale     | 2      | Explain the scientific background and rationale for the investigation being reported                                                                                                                                                          | page 3 and             |
| Objectives               | 3      | State specific objectives, including any prespecified hypotheses                                                                                                                                                                              | page 4                 |
| <b>Methods</b>           |        |                                                                                                                                                                                                                                               |                        |
| Study design             | 4      | Present key elements of study design early in the paper                                                                                                                                                                                       | From page 4            |
| Setting                  | 5      | Describe the setting, locations, and relevant dates, including periods of recruitment, exposure, follow-up, and data collection <b>in addition reference is given for further reading of detailed information on MoBa study (referece 22)</b> | Page 4                 |
| Participants             | 6      | (a) Give the eligibility criteria, and the sources and methods of selection of participants. Describe methods of follow-up                                                                                                                    | NA                     |
|                          |        | (b) For matched studies, give matching criteria and number of exposed and unexposed                                                                                                                                                           | NA                     |
| Variables                | 7      | Clearly define all outcomes, exposures, predictors, potential confounders, and effect modifiers. Give diagnostic criteria, if applicable                                                                                                      | Presented on pages 5-7 |
| Data sources/measurement | 8*     | For each variable of interest, give sources of data and details of methods of assessment (measurement). Describe comparability of assessment methods if there is more than one group                                                          | Page 5-7               |
| Bias                     | 9      | Describe any efforts to address potential sources of bias <b>controlling for confounding and covariates</b>                                                                                                                                   | pages 6 and 7.         |
| Study size               | 10     | Explain how the study size was arrived at                                                                                                                                                                                                     | figure 1 and page5     |
| Quantitative variables   | 11     | Explain how quantitative variables were handled in the analyses. If applicable, describe which groupings were chosen and why                                                                                                                  | Page 6                 |
| Statistical methods      | 12     | (a) Describe all statistical methods, including those used to control for confounding                                                                                                                                                         | page 7 and 8           |
|                          |        | (b) Describe any methods used to examine subgroups and interactions                                                                                                                                                                           | page 8                 |
|                          |        | (c) Explain how missing data were addressed                                                                                                                                                                                                   | page 8                 |
|                          |        | (d) If applicable, explain how loss to follow-up was addressed                                                                                                                                                                                | NA                     |
|                          |        | (e) Describe any sensitivity analyses                                                                                                                                                                                                         | page 8                 |
| <b>Results</b>           |        |                                                                                                                                                                                                                                               |                        |
| Participants             | 13*    | (a) Report numbers of individuals at each stage of study—eg numbers potentially eligible, examined for eligibility, confirmed eligible, included in the study, completing follow-up, and analysed <b>All listed in Figure 1</b>               |                        |
|                          |        | (b) Give reasons for non-participation at each stage                                                                                                                                                                                          | Page 5                 |

1  
2  
3  
4  
5  
6  
7  
8  
9  
10  
11  
12  
13  
14  
15  
16  
17  
18  
19  
20  
21  
22  
23  
24  
25  
26  
27  
28  
29  
30  
31  
32  
33  
34  
35  
36  
37  
38  
39  
40  
41  
42  
43  
44  
45  
46  
47  
48  
49

|                          |     |                                                                                                                                                                                                              |                                                                            |
|--------------------------|-----|--------------------------------------------------------------------------------------------------------------------------------------------------------------------------------------------------------------|----------------------------------------------------------------------------|
|                          |     | (c) Consider use of a flow diagram <a href="#">Figure 1</a>                                                                                                                                                  |                                                                            |
| Descriptive data         | 14* | (a) Give characteristics of study participants (eg demographic, clinical, social) and information on exposures and potential confounders                                                                     | <a href="#">Table 1: page 9 and 10</a>                                     |
|                          |     | (b) Indicate number of participants with missing data for each variable of interest                                                                                                                          | <a href="#">Table 1</a>                                                    |
|                          |     | (c) Summarise follow-up time (eg, average and total amount)                                                                                                                                                  | NA                                                                         |
| Outcome data             | 15* | Report numbers of outcome events or summary measures over time                                                                                                                                               | <a href="#">Table 1</a>                                                    |
| Main results             | 16  | (a) Give unadjusted estimates and, if applicable, confounder-adjusted estimates and their precision (eg, 95% confidence interval). Make clear which confounders were adjusted for and why they were included | <a href="#">Page 6-7, 11 - 12 and Table 2 and 3</a>                        |
|                          |     | (b) Report <i>category</i> boundaries when continuous variables were categorized                                                                                                                             | <a href="#">Page 6 and Table 1</a>                                         |
|                          |     | (c) If relevant, consider translating estimates of relative risk into absolute risk for a meaningful time period                                                                                             |                                                                            |
| Other analyses           | 17  | Report other analyses done—eg analyses of subgroups and interactions, and sensitivity analyses                                                                                                               | <a href="#">page 12-13</a><br><a href="#">Supplementary Tables 1 and 2</a> |
| <b>Discussion</b>        |     |                                                                                                                                                                                                              |                                                                            |
| Key results              | 18  | Summarise key results with reference to study objectives                                                                                                                                                     | <a href="#">page 13</a>                                                    |
| <b>Limitations</b>       |     |                                                                                                                                                                                                              |                                                                            |
| Interpretation           | 20  | Give a cautious overall interpretation of results considering objectives, limitations, multiplicity of analyses, results from similar studies, and other relevant evidence                                   | <a href="#">Page 13-16</a>                                                 |
| Generalisability         | 21  | Discuss the generalisability (external validity) of the study results                                                                                                                                        | <a href="#">Page 14</a>                                                    |
| <b>Other information</b> |     |                                                                                                                                                                                                              |                                                                            |
| Funding                  | 22  | Give the source of funding and the role of the funders for the present study and, if applicable, for the original study on which the present article is based                                                | <a href="#">Page 17</a>                                                    |

\*Give information separately for cases and controls in case-control studies and, if applicable, for exposed and unexposed groups in cohort and cross-sectional studies.

**Note:** An Explanation and Elaboration article discusses each checklist item and gives methodological background and published examples of transparent reporting. The STROBE checklist is best used in conjunction with this article (freely available on the Web sites of PLoS Medicine at <http://www.plosmedicine.org/>, Annals of Internal Medicine at <http://www.annals.org/>, and Epidemiology at <http://www.epidem.com/>). Information on the STROBE Initiative is available at [www.strobe-statement.org](http://www.strobe-statement.org).
